# Supplementary material for: Supplementing Ryegrass Ameliorates Commercial Diet-Induced Gut Microbial Dysbiosis-Associated Spleen Dysfunctions by Gut–Microbiota–Spleen Axis
Source: MDPI journal article supplement (doi:10.3390/nu16050747), 2024-03-05
Supplement: s1 [file s1]

## Nutrients

### Supplementing Ryegrass Ameliorates Commercial Diet-Induced Gut Microbial Dysbiosis-Associated Spleen Dysfunctions by Gut–Microbiota–Spleen Axis

Qasim Ali <sup>1</sup>, Sen Ma <sup>1,2,3</sup>, Boshuai Liu <sup>1,2,3</sup>, Jiakuan Niu <sup>1</sup>, Mengqi Liu <sup>1</sup>, Ahsan Mustafa <sup>4</sup>, Defeng Li <sup>1,2,3</sup>, Zhichang Wang <sup>1,2,3</sup>, Hao Sun <sup>1,2,3</sup>, Yalei Cui <sup>1,2,3</sup> and Yinghua Shi <sup>1,2,3,\*</sup>

- <sup>1</sup> Department of Animal Nutrition and Feed Science, College of Animal Science and Technology, Henan Agricultural University, Zhengzhou 450046, China; qasimali@henau.edu.cn (Q.A.); ms0321021@163.com (S.M.); boshuailiu1@126.com (B.L.); niujiakuan2022@126.com (J.N.); 2019110376@sdau.edu.cn (M.L.); leadeophone@126.com (D.L.); zcwang@henau.edu.cn (Z.W.); sunhao@henau.edu.cn (H.S.); yaleicui@henau.edu.cn (Y.C.)
- <sup>2</sup> Henan Key Laboratory of Innovation and Utilization of Grassland Resources, Zhengzhou 450002, China
- <sup>3</sup> Henan Herbage Engineering Technology Research Center, Zhengzhou 450001, China
- <sup>4</sup> Department of Animal Nutrition, Sichuan Agricultural University, Chengdu 611130, China; dr.ahsan.mustafa@gmail.com
- \* Correspondence: annysyh@henau.edu.cn

**Table S1: The nutrients and chemical composition of the diet (two stages) offered to geese.**

| Ingredients, %                 | Diets  |          |
|--------------------------------|--------|----------|
|                                | Grower | Finisher |
| Wheat                          | 57.3   | 59       |
| Rice bran                      | 5      | 4        |
| Corn germ cake (exp.)          | 4      | 3.2      |
| Corn oil                       | 5      | 7        |
| Dumpling powder                | 3      | 2        |
| Corn distiller's grains (DDGS) | 6.5    | 7        |
| Spouting germ meal             | 3      | 2        |
| Soybean meal (sol.)            | 7      | 6        |
| Peanut meal (sol.)             | 1.5    | 1        |

|                                 |       |       |
|---------------------------------|-------|-------|
| Albumen powder                  | 2     | 1.5   |
| Stone powder                    | 1.1   | 1     |
| Liquid methionine               | 0.25  | 0.3   |
| MuLaoDa-2                       | 1.25  | 2     |
| 201/202 gunk                    | 2.5   | 3     |
| Calcium hydrogen phosphate      | 0.6   | 1     |
| <i>Chemical composition (%)</i> |       |       |
| Crude protein                   | 20.12 | 15.54 |
| Ash                             | 12.89 | 12.86 |
| Neutral detergent fiber         | 13.25 | 30.55 |
| Acid detergent fiber            | 5.5   | 27.02 |
| Calcium                         | 1.15  | 1.07  |
| Phosphorous                     | 0.47  | 0.32  |

**Table S2. Primer sequences used for quantitative real-time PCR**

| Gene                | Forward primer (Sequence 5'- 3') | Reverse primer (Sequence 5'- 3') |
|---------------------|----------------------------------|----------------------------------|
| Srck                | CTGCCGAATCCAAGCTCTTC             | TAGTGAGGGAATGAGCCAGC             |
| PI3K                | TTCTTGAGACTGGGAGCAG              | GCCTGTTCTCGTTGCTATG              |
| P47 <sup>Phox</sup> | CCAAAGGATGCCAAGAAAAA             | CAGCCCCGTTTATTCTTCAA             |
| NADPH               | ATGTCCAGCCACCCATGTTA             | CAACCCTCCGACGTGATTTTC            |
| TLR2                | CCTGGTGGTGTCTTTGATCT             | GTAGCAGATGTCTTTTGCG              |
| TLR4                | AGGGCTACAGGTCAACAGAC             | GACGTTCAACAGCCGAATAC             |
| MyD88               | CTGCGTCTTTGATCGGGATG             | GGCTTTGCACTTCACTGGAA             |
| NIK                 | CAACCCTCCGACGTGATTTTC            | TTTGCTGCTCGATACGCTTC             |
| IKK $\alpha$        | GCATGTACCTACCCGCTAT              | ACACCGACAGGCTTACCATC             |
| NF- $\kappa$ B      | GGCAGAGATGGTGGAAAGACT            | GTTTGCCATCACCACCATGT             |
| IRAK                | ACTGCTGAGCTCATGACCTT             | TGGGAGAGCACAGTAAGCAC             |
| TRAF6               | AGAGGAATGAACTGGCACGA             | TTGTCTTACCAGGCGACCTT             |
| TAK1                | CGGGATTCAGATGGGCATTG             | GCAGTGTCTCAATCGCCATT             |
| IKB- $\alpha$       | AAAGCTGGATGTGACCTGGA             | GTTGTAGTTGGTTGCCTGCA             |
| NLRP3               | AAACAAACCCGATGCCAAGG             | CAGGTTGCTGTGGTTGTTCA             |
| Caspase-1           | ATACACTTGCCACGGGAGAC             | TGCAAAATCCTTCATGACCA             |
| IL-1 $\beta$        | CACATCACAACCCACAGCAA             | CTGCCCCCTCCGTCTTCTTA             |
| IL-18               | AAAGAAGGAAGGTGGAGGGG             | TCTGTCTCTCTAACGCTGCC             |
| GPR109A             | AGCCAGGGGACATATACGTG             | TCCCTCGGATCATGAAGCTC             |
| FFAR2               | GCACCAGAGATCCTAAGGGG             | ATGGGAGGCCTTGACAGAAA             |
| FFAR3               | AGCAAGGATCTGGAAGTCT              | TCCAAGTACTCAGCAAGGGG             |
| AMPK                | TCTCGCCCTCATCCTGAAAG             | CTCGACACACTTCAGCCATG             |
| HDAC                | GAACAACCTCTGCCACGGTT             | CCTCCGACTTCACATCCACT             |
| Keap1               | CTGAACGAGGCCCTCAAGTA             | CAAACCTCGTAGCGGGGAATG            |
| NFE2L2              | CGCCTTGAAGCTCATCTCAC             | CCTCTCCTGCGTATATCCCG             |

|                |                       |                      |
|----------------|-----------------------|----------------------|
| NRF2           | CGCCTTGAAGCTCATCTCAC  | CCTCTCCTGCGTATATCCCG |
| NQ01           | GACCCCAAGCACTTCGTCTA  | CGAAGCCTTGGATGATGACG |
| GCLC           | GGAGAGTGGAATTCAGGCCT  | AGAGCCACATCCATCCACAA |
| GCLM           | TGCCCCACCTCCTATTGAAG  | TGTGAGATCAGGTGGCATCA |
| GSTA4          | GCACCTCTGTTCCAAAGCAA  | AATCCAGGACACAGCCATCA |
| HMOX1          | AGGGCTGGCTTTCTTTACCT  | GTGACCGTTTTCTGGCTTT  |
| SOD            | GGAAGAATCAGCGGCTTGTC  | CCAATGATGCAGTGTGGTCC |
| GPx            | GCTTCCCCCTCCAACCAATTC | TAGACCTTCTGCTCCTTGGC |
| CAT            | CCGAGTCTTTGCATCAGGTG  | GCCTTCCTGCTTCCTCTACA |
| IL-4           | TGACAGGGTATTGGTCCACC  | ACGGAAGAAGCAGAAGGTGA |
| IL-10          | CATCAAGAACAGCGAGCACC  | GCACCCACCTTTTCAAACGT |
| iNOS           | CTCATTCTCCAAGCGAACGG  | GCACTCCTATCTCTGTCCCC |
| COX2           | GGTTCTACAATGGAGAGCGC  | TGTTCTTGCCACTTGAGCTG |
| TNF- $\alpha$  | GGTCCACAACGAGTTCATCC  | AGGAGGAGGAGGAGATGGAG |
| IL-6           | GGAAGACCCTTGCTCTCCTT  | TGGAGCCAGAAGATGAGTGG |
| CD4            | AGCAAGACAGAGCTGGTGGT  | TCCATCAGGTGACAGTTCCA |
| B220           | GGCCATACTACCCAAAGCAA  | ATGCCTCCTGCTTGTTTTT  |
| CD19           | GGAGGAGAATTGGATGCTGA  | CTCGTTCTCCACTCGTAGCC |
| IgD            | TTTCTAACAGCACCGCCTCT  | GGTCGCTCTTCGTCTTCATC |
| CD3            | TTGGGTGCAATTTATGACGA  | ACAGCAACCATCAGGAGGAC |
| CD8            | GTGAAGTTGCCACAGCAAAA  | GCAGCTTTTTTGAGAGGATG |
| IL-2           | AGAAAAGCTGGGAACAAGCA  | ACAGATCTTGCATCCCGTTC |
| TGF-B          | AGCTAGCGGTCTTGACATT   | GATTGTTCCCCACATCCAAC |
| IL-17          | CTGCCTACGGGAAGGTGATA  | GGTCCTCGTCGATCCTGTAA |
| $\beta$ -actin | CAACGAGCGGTTCAAGTGT   | TGGAGTTGAAGGTGGTCTCG |

| Species                 | Relative abundance in IHF group (45 Days) | Relative abundance in AGF group (45 Days) | Log2FC     | P-Value  | FDR      |
|-------------------------|-------------------------------------------|-------------------------------------------|------------|----------|----------|
| <i>Clostridia</i>       | 55.766667                                 | 32.550000                                 | -0.7767455 | 1.06E-06 | 1.32E-06 |
| <i>Bacteroidia</i>      | 43.556667                                 | 20.576667                                 | -1.0818843 | 9.47E-08 | 1.70E-07 |
| <i>Bacilli</i>          | 11.570000                                 | 12.543333                                 | 0.1165319  | 5.86E-06 | 6.21E-06 |
| <i>Coriobacteriia</i>   | 3.407667                                  | 3.598667                                  | 0.0786783  | 1.37E-05 | 1.37E-05 |
| <i>Actinobacteria</i>   | 2.777000                                  | 5.294667                                  | 0.9310127  | 3.51E-08 | 9.46E-08 |
| <i>Vampirivibrionia</i> | 1.217333                                  | 4.904333                                  | 2.0103328  | 1.47E-07 | 2.52E-07 |

| <i>Gammaproteobacteria</i> | 0.3723333                                 | 0.1938667                                 | -0.9415300 | 6.98E-08 | 1.40E-07 |
|----------------------------|-------------------------------------------|-------------------------------------------|------------|----------|----------|
| <i>Desulfovibrionia</i>    | 0.3084333                                 | 0.2547667                                 | -0.2757822 | 4.82E-06 | 5.26E-06 |
| <i>Verrucomicrobiae</i>    | 0.0062670                                 | 0.2127667                                 | 5.0853533  | 5.06E-08 | 1.07E-07 |
| <i>Alphaproteobacteria</i> | 0.0092160                                 | 0.4268333                                 | 5.5333883  | 3.00E-09 | 1.08E-08 |
| <i>Negativicutes</i>       | 0.1705000                                 | 0.0766767                                 | -1.1529122 | 2.12E-06 | 2.39E-06 |
| Species                    | Relative abundance in IHF group (60 Days) | Relative abundance in AGF group (60 Days) | Log2FC     | P-Value  | FDR      |
| <i>Clostridia</i>          | 58.7833333                                | 47.9333333                                | -0.2943779 | 3.82E-06 | 3.82E-06 |
| <i>Bacteroidia</i>         | 17.6533333                                | 16.0700000                                | -0.1355707 | 2.22E-06 | 2.28E-06 |
| <i>Bacilli</i>             | 9.1833333                                 | 25.5633333                                | 1.4769862  | 1.86E-07 | 3.53E-07 |
| <i>Coriobacteriia</i>      | 8.3870000                                 | 6.4136667                                 | -0.3870055 | 3.57E-07 | 5.35E-07 |
| <i>Actinobacteria</i>      | 0.1537333                                 | 1.5070000                                 | 3.2931775  | 2.55E-07 | 4.59E-07 |
| <i>Vampirivibrionia</i>    | 0.4473667                                 | 2.2076667                                 | 2.3029927  | 2.58E-08 | 7.15E-08 |
| <i>Gammaproteobacteria</i> | 2.9070000                                 | 1.0683333                                 | -1.4441692 | 6.57E-08 | 1.48E-07 |
| <i>Desulfovibrionia</i>    | 0.5774333                                 | 0.1263667                                 | -2.1920384 | 2.73E-09 | 1.09E-08 |
| <i>Verrucomicrobiae</i>    | 0.1465000                                 | 0.2055000                                 | 0.4882377  | 3.17E-09 | 1.74E-08 |
| <i>Alphaproteobacteria</i> | 0.0309700                                 | 0.0390767                                 | 0.3354360  | 8.45E-08 | 1.69E-07 |
| <i>Negativicutes</i>       | 0.0313500                                 | 0.0140367                                 | -1.1592651 | 7.41E-08 | 1.57E-07 |
| Species                    | Relative abundance in IHF group (90 Days) | Relative abundance in AGF group (90 Days) | Log2FC     | P-Value  | FDR      |
| <i>Clostridia</i>          | 61.4633333                                | 46.6433333                                | -0.3980551 | 9.11E-07 | 1.21E-06 |
| <i>Bacteroidia</i>         | 32.6400000                                | 14.6600000                                | -1.1547560 | 1.55E-07 | 2.78E-07 |
| <i>Bacilli</i>             | 10.2233333                                | 14.4833333                                | 0.5025280  | 2.48E-05 | 2.63E-05 |
| <i>Coriobacteriia</i>      | 5.2470000                                 | 6.3533333                                 | 0.2760209  | 7.26E-07 | 1.03E-06 |
| <i>Actinobacteria</i>      | 0.2707000                                 | 1.2470000                                 | 2.2036947  | 4.25E-07 | 6.95E-07 |
| <i>Vampirivibrionia</i>    | 0.3247000                                 | 0.9645000                                 | 1.5706739  | 9.18E-02 | 5.21E-08 |
| <i>Gammaproteobacteria</i> | 0.1896333                                 | 0.0733633                                 | -1.3700815 | 5.33E-07 | 8.34E-07 |
| <i>Desulfovibrionia</i>    | 1.8086667                                 | 1.7050000                                 | -0.0851548 | 2.53E-04 | 2.60E-04 |
| <i>Verrucomicrobiae</i>    | 0.0910533                                 | 0.1166333                                 | 0.3571964  | 1.10E-05 | 1.24E-05 |
| <i>Alphaproteobacteria</i> | 0.0427700                                 | 0.1185000                                 | 1.4702159  | 3.15E-06 | 3.78E-06 |
| <i>Negativicutes</i>       | 0.1457000                                 | 0.0785367                                 | -0.8915626 | 5.96E-07 | 8.94E-07 |

**Table S3. Effect of ryegrass on gut microbial richness of geese at class level**

Table S4. Effect of ryegrass on the gut microbial richness of geese at a family level

| Species                                     | Relative abundance in IHF<br>group (45 Days) | Relative abundance in AGF<br>group (45 Days) | Log2FC    | P-Value  | FDR      |
|---------------------------------------------|----------------------------------------------|----------------------------------------------|-----------|----------|----------|
| <i>Ruminococcaceae</i>                      | 22.133333                                    | 8.607                                        | -1.362638 | 4.16E-07 | 5.71E-07 |
| <i>Bacteroidaceae</i>                       | 8.884333                                     | 23.143333                                    | 1.381261  | 1.19E-06 | 1.44E-06 |
| <i>Lachnospiraceae</i>                      | 9.985333                                     | 8.288333                                     | -0.268729 | 6.94E-07 | 8.96E-07 |
| <i>norank_o__Clostridia_UCG-014</i>         | 8.146                                        | 0.989767                                     | -3.040931 | 8.51E-09 | 5.67E-08 |
| <i>Oscillospiraceae</i>                     | 4.448333                                     | 6.825667                                     | 0.617705  | 1.57E-07 | 3.31E-07 |
| <i>Rikenellaceae</i>                        | 3.736667                                     | 8.908333                                     | 1.253404  | 8.31E-09 | 5.67E-08 |
| <i>norank_o__RF39</i>                       | 3.033667                                     | 0.1326                                       | -4.51591  | 1.38E-07 | 3.06E-07 |
| <i>Prevotellaceae</i>                       | 5.265667                                     | 3.224333                                     | -0.707615 | 3.33E-07 | 4.94E-07 |
| <i>Eubacterium_coprostanoligenes_group</i>  | 3.375                                        | 0.062727                                     | -5.749665 | 3.97E-08 | 1.36E-07 |
| <i>Erysipelatoclostridiaceae</i>            | 4.366667                                     | 1.179                                        | -1.888969 | 2.19E-06 | 2.57E-06 |
| <i>Enterococcaceae</i>                      | 3.155                                        | 0.153766667                                  | -4.358825 | 2.07E-07 | 3.95E-07 |
| <i>Eggerthellaceae</i>                      | 1.498333                                     | 2.818667                                     | 0.911654  | 3.19E-08 | 1.36E-07 |
| <i>Peptococcaceae</i>                       | 2.227333                                     | 1.647667                                     | -0.434893 | 2.65E-06 | 3.02E-06 |
| <i>Christensenellaceae</i>                  | 1.448333                                     | 0.6197                                       | -1.224752 | 4.28E-07 | 5.71E-07 |
| <i>Lactobacillaceae</i>                     | 0.697533                                     | 6.156667                                     | 3.141815  | 4.59E-06 | 4.96E-06 |
| <i>Peptostreptococcaceae</i>                | 1.457667                                     | 0.02545                                      | -5.839851 | 1.02E-07 | 2.62E-07 |
| <i>norank_o__Gastranaerophilales</i>        | 1.216667                                     | 4.904333                                     | 2.011123  | 2.61E-07 | 4.36E-07 |
| <i>Erysipelotrichaceae</i>                  | 4.4                                          | 0.254767                                     | -4.110255 | 1.16E-03 | 1.16E-03 |
| <i>Bifidobacteriaceae</i>                   | 1.834667                                     | 5.258333                                     | 1.519088  | 2.32E-07 | 4.06E-07 |
| <i>Butyricicoccaceae</i>                    | 1.083333                                     | 2.337667                                     | 1.109592  | 8.83E-07 | 1.10E-06 |
| <i>Coriobacteriaceae</i>                    | 0.969533                                     | 0.126833                                     | -2.934357 | 7.04E-09 | 5.67E-08 |
| <i>Tannerellaceae</i>                       | 0.6593                                       | 3.343667                                     | 2.342424  | 4.22E-07 | 5.71E-07 |
| <i>Muribaculaceae</i>                       | 0.795333                                     | 2.786667                                     | 1.808909  | 2.75E-06 | 3.05E-06 |
| <i>Atopobiaceae</i>                         | 1.133333                                     | 0.001856                                     | -9.253901 | 2.12E-04 | 2.18E-04 |
| <i>Anaerovoracaceae</i>                     | 0.553667                                     | 0.189333                                     | -1.548089 | 1.05E-07 | 2.62E-07 |
| <i>Desulfovibrionaceae</i>                  | 0.254667                                     | 0.3084                                       | 0.276193  | 9.43E-06 | 9.92E-06 |
| <i>norank_o__Bacteroidales</i>              | 0.038767                                     | 0.8877                                       | 4.517184  | 7.71E-10 | 2.67E-08 |
| <i>Barnesiellaceae</i>                      | 1.838667                                     | 0.3237                                       | -2.505931 | 4.09E-08 | 1.36E-07 |
| <i>Streptococcaceae</i>                     | 0.063767                                     | 0.339567                                     | 2.41282   | 3.22E-08 | 1.36E-07 |
| <i>Enterobacteriaceae</i>                   | 0.3676                                       | 0.099543                                     | -1.88474  | 4.09E-08 | 1.36E-07 |
| <i>norank_o__Clostridia_vadinBB60_group</i> | 0.049383                                     | 2.185667                                     | 5.467905  | 3.07E-07 | 4.91E-07 |
| <i>Coriobacteriales_Incertae_Sedis</i>      | 0.020273                                     | 0.459467                                     | 4.502305  | 6.92E-08 | 1.98E-07 |
| <i>Monoglobaceae</i>                        | 0.085883                                     | 0.220733                                     | 1.361854  | 1.35E-07 | 3.06E-07 |
| <i>UCG-010</i>                              | 0.2047                                       | 0.399867                                     | 0.966008  | 2.33E-07 | 4.06E-07 |
| <i>Succinivibrionaceae</i>                  | 0.022477                                     | 0.001107                                     | -4.343701 | 2.06E-08 | 1.17E-07 |
| <i>Planococcaceae</i>                       | 0.000369                                     | 0.003318                                     | 3.168737  | 6.39E-09 | 5.67E-08 |
| <i>Akkermansiaceae</i>                      | 0.006267                                     | 0.212767                                     | 5.085353  | 5.06E-08 | 1.56E-07 |
| <i>Marinifilaceae</i>                       | 0.134833                                     | 0.019177                                     | -2.813753 | 2.01E-07 | 3.95E-07 |

| <i>Anaerofustaceae</i>                      | 0.2925                                       | 0.050877                                     | -2.523361 | 3.20E-07 | 4.92E-07 |
|---------------------------------------------|----------------------------------------------|----------------------------------------------|-----------|----------|----------|
| <i>unclassified_c__Clostridia</i>           | 0.026177                                     | 0.090683                                     | 1.792556  | 1.34E-09 | 2.67E-08 |
| Species                                     | Relative abundance in IHF<br>group (60 Days) | Relative abundance in AGF<br>group (60 Days) | Log2FC    | P-Value  | FDR      |
| <i>Ruminococcaceae</i>                      | 21.606667                                    | 10.543333                                    | -1.035145 | 1.82E-07 | 4.84E-07 |
| <i>Bacteroidaceae</i>                       | 6.536                                        | 8.072                                        | 0.304518  | 2.12E-07 | 5.02E-07 |
| <i>Lachnospiraceae</i>                      | 3.97                                         | 14.536667                                    | 1.872486  | 1.24E-06 | 1.99E-06 |
| <i>norank_o__Clostridia_UCG-014</i>         | 11.846667                                    | 4.994667                                     | -1.246021 | 3.83E-07 | 8.52E-07 |
| <i>Oscillospiraceae</i>                     | 3.095333                                     | 4.543667                                     | 0.553762  | 1.30E-06 | 2.00E-06 |
| <i>Rikenellaceae</i>                        | 3.9733333                                    | 4.427                                        | 0.155980  | 0.022095 | 0.022095 |
| <i>norank_o__RF39</i>                       | 6.394667                                     | 3.058                                        | -1.064281 | 1.25E-07 | 4.49E-07 |
| <i>Prevotellaceae</i>                       | 4.373                                        | 0.9485                                       | -2.204904 | 1.54E-07 | 4.49E-07 |
| <i>Eubacterium_coprostanoligenes_group</i>  | 7.504                                        | 2.85                                         | -1.396698 | 1.87E-06 | 2.58E-06 |
| <i>Erysipelatoclostridiaceae</i>            | 2.615667                                     | 2.35                                         | -0.154518 | 6.16E-04 | 6.32E-04 |
| <i>Enterococcaceae</i>                      | 9.964333                                     | 1.706                                        | -2.546156 | 3.26E-09 | 3.26E-08 |
| <i>Eggerthellaceae</i>                      | 2.533333                                     | 4.263333                                     | 0.750945  | 1.67E-05 | 1.86E-05 |
| <i>Peptococcaceae</i>                       | 5.593667                                     | 0.477433                                     | -3.550423 | 4.49E-08 | 2.00E-07 |
| <i>Christensenellaceae</i>                  | 2.386333                                     | 1.484333                                     | -0.68498  | 2.46E-06 | 3.17E-06 |
| <i>Lactobacillaceae</i>                     | 0.135667                                     | 3.667                                        | 4.756462  | 1.78E-10 | 3.56E-09 |
| <i>Peptostreptococcaceae</i>                | 2.004333                                     | 4.556                                        | 1.184645  | 2.13E-07 | 5.02E-07 |
| <i>norank_o__Gastranaerophilales</i>        | 0.4473                                       | 2.206333                                     | 2.302336  | 1.21E-07 | 4.49E-07 |
| <i>Erysipelotrichaceae</i>                  | 1.294667                                     | 1.924333                                     | 0.571778  | 5.60E-07 | 1.13E-06 |
| <i>Bifidobacteriaceae</i>                   | 0.04348                                      | 1.463333                                     | 5.072763  | 2.77E-06 | 3.47E-06 |
| <i>Butyricicoccaceae</i>                    | 0.434833                                     | 0.864633                                     | 0.991626  | 2.99E-24 | 1.19E-22 |
| <i>Coriobacteriaceae</i>                    | 4.105                                        | 0.1717                                       | -4.57942  | 3.91E-08 | 1.96E-07 |
| <i>Tannerellaceae</i>                       | 0.584633                                     | 0.498433                                     | -0.230132 | 6.73E-07 | 1.24E-06 |
| <i>Muribaculaceae</i>                       | 0.407333                                     | 0.5825                                       | 0.516048  | 9.58E-06 | 1.09E-05 |
| <i>Atopobiaceae</i>                         | 1.493667                                     | 0.548733                                     | -1.444681 | 1.68E-06 | 2.40E-06 |
| <i>Anaerovoracaceae</i>                     | 1.087333                                     | 0.611567                                     | -0.830213 | 1.57E-07 | 4.49E-07 |
| <i>Desulfovibrionaceae</i>                  | 0.126267                                     | 0.577333                                     | 2.192931  | 2.73E-09 | 3.26E-08 |
| <i>norank_o__Bacteroidales</i>              | 0.714633                                     | 1.056667                                     | 0.564245  | 2.30E-06 | 3.06E-06 |
| <i>Barnesiellaceae</i>                      | 0.711767                                     | 0.556367                                     | -0.355368 | 8.28E-07 | 1.44E-06 |
| <i>Streptococcaceae</i>                     | 0.290733                                     | 0.364333                                     | 0.325563  | 3.69E-06 | 4.48E-06 |
| <i>Enterobacteriaceae</i>                   | 2.786333                                     | 0.085873                                     | -5.020014 | 7.93E-09 | 5.69E-08 |
| <i>norank_o__Clostridia_vadinBB60_group</i> | 0.126533                                     | 0.222567                                     | 0.81472   | 1.51E-06 | 2.23E-06 |
| <i>Coriobacteriales_Incertae_Sedis</i>      | 0.212667                                     | 1.185                                        | 2.478221  | 5.65E-07 | 1.13E-06 |
| <i>Monoglobaceae</i>                        | 0.173                                        | 0.295567                                     | 0.772712  | 1.38E-04 | 1.45E-04 |
| <i>UCG-010</i>                              | 0.096567                                     | 0.225367                                     | 1.222677  | 8.71E-07 | 1.45E-06 |
| <i>Succinivibrionaceae</i>                  | 0.9567                                       | 0.037667                                     | -4.666706 | 1.05E-08 | 6.01E-08 |
| <i>Planococcaceae</i>                       | 0.003676                                     | 0.590567                                     | 7.327819  | 8.53E-09 | 5.69E-08 |
| <i>Akkermansiaceae</i>                      | 0.145367                                     | 0.205433                                     | 0.498974  | 1.54E-07 | 4.49E-07 |
| <i>Marinifilaceae</i>                       | 0.226667                                     | 0.102267                                     | -1.148236 | 8.08E-06 | 9.50E-06 |

| <i>Anaerofustaceae</i>                      | 0.06708                                      | 0.056533                                     | -0.246781 | 9.23E-05 | 9.98E-05 |
|---------------------------------------------|----------------------------------------------|----------------------------------------------|-----------|----------|----------|
| <i>unclassified_c__Clostridia</i>           | 0.05346                                      | 0.064867                                     | 0.279017  | 6.83E-07 | 1.24E-06 |
| Species                                     | Relative abundance in IHF<br>group (90 Days) | Relative abundance in AGF<br>group (90 Days) | Log2FC    | P-Value  | FDR      |
| <i>Ruminococcaceae</i>                      | 12.583333                                    | 18.356667                                    | 0.54479   | 1.67E-07 | 5.77E-07 |
| <i>Bacteroidaceae</i>                       | 6.726333                                     | 14.38                                        | 1.096171  | 9.11E-07 | 1.92E-06 |
| <i>Lachnospiraceae</i>                      | 9.352667                                     | 9.525667                                     | 0.026442  | 1.67E-05 | 1.91E-05 |
| <i>norank_o__Clostridia_UCG-014</i>         | 10.746667                                    | 9.762333                                     | -0.138591 | 1.12E-05 | 1.36E-05 |
| <i>Oscillospiraceae</i>                     | 5.114                                        | 10.18                                        | 0.993213  | 2.36E-06 | 3.49E-06 |
| <i>Rikenellaceae</i>                        | 3.644667                                     | 8.455                                        | 1.2140179 | 9.6E-09  | 1.28E-07 |
| <i>norank_o__RF39</i>                       | 5.885                                        | 4.733333                                     | -0.314186 | 0.000394 | 0.000404 |
| <i>Prevotellaceae</i>                       | 5.132667                                     | 1.594333                                     | -1.686755 | 4.44E-09 | 1.28E-07 |
| <i>Eubacterium_coprostanoligenes_group</i>  | 2.935333                                     | 1.236333                                     | -1.247457 | 1.73E-07 | 5.77E-07 |
| <i>Erysipelatoclostridiaceae</i>            | 4.263                                        | 2.213667                                     | -0.945431 | 1.32E-08 | 1.32E-07 |
| <i>Enterococcaceae</i>                      | 1.398333                                     | 0.133333                                     | -3.390599 | 1.25E-06 | 2.3E-06  |
| <i>Eggerthellaceae</i>                      | 1.002667                                     | 3.946667                                     | 1.976793  | 0.000013 | 1.53E-05 |
| <i>Peptococcaceae</i>                       | 0.861733                                     | 0.648767                                     | -0.409542 | 1.96E-07 | 5.81E-07 |
| <i>Christensenellaceae</i>                  | 3.198333                                     | 1.894333                                     | -0.75563  | 1.18E-06 | 2.3E-06  |
| <i>Lactobacillaceae</i>                     | 0.1267                                       | 0.155533                                     | 0.295807  | 1.07E-05 | 1.34E-05 |
| <i>Peptostreptococcaceae</i>                | 1.406667                                     | 0.683733                                     | -1.040775 | 6.8E-08  | 3.02E-07 |
| <i>norank_o__Gastranaerophilales</i>        | 0.964433                                     | 0.324633                                     | -1.57087  | 4.89E-08 | 2.44E-07 |
| <i>Erysipelotrichaceae</i>                  | 1.445333                                     | 0.907267                                     | -0.671804 | 2.35E-06 | 3.49E-06 |
| <i>Bifidobacteriaceae</i>                   | 0.098057                                     | 1.237333                                     | 3.657475  | 4.11E-08 | 2.35E-07 |
| <i>Butyricicoccaceae</i>                    | 1.074                                        | 2.835667                                     | 1.400694  | 2.86E-07 | 7.64E-07 |
| <i>Coriobacteriaceae</i>                    | 1.785                                        | 0.817667                                     | -1.126339 | 4.65E-07 | 1.1E-06  |
| <i>Tannerellaceae</i>                       | 1.267667                                     | 0.4507                                       | -1.491936 | 4.08E-08 | 2.35E-07 |
| <i>Muribaculaceae</i>                       | 0.660567                                     | 1.287667                                     | 0.962983  | 2.03E-07 | 5.81E-07 |
| <i>Atopobiaceae</i>                         | 2.124333                                     | 1.193                                        | -0.832416 | 1.6E-06  | 2.67E-06 |
| <i>Anaerovoracaceae</i>                     | 1.846667                                     | 1.125                                        | -0.714998 | 1.71E-06 | 2.73E-06 |
| <i>Desulfovibrionaceae</i>                  | 1.704333                                     | 1.808                                        | 0.085187  | 0.000253 | 0.000266 |
| <i>norank_o__Bacteroidales</i>              | 0.9415                                       | 0.949467                                     | 0.012156  | 0.00014  | 0.000151 |
| <i>Barnesiellaceae</i>                      | 0.439633                                     | 0.3577                                       | -0.297551 | 1.32E-06 | 2.3E-06  |
| <i>Streptococcaceae</i>                     | 0.8545                                       | 1.828                                        | 1.097114  | 6.38E-07 | 1.42E-06 |
| <i>Enterobacteriaceae</i>                   | 0.065623                                     | 0.005528                                     | -3.569379 | 2.84E-08 | 2.28E-07 |
| <i>norank_o__Clostridia_vadinBB60_group</i> | 0.151833                                     | 0.3928                                       | 1.371306  | 9.57E-09 | 1.28E-07 |
| <i>Coriobacteriales_Incertae_Sedis</i>      | 0.254433                                     | 0.283333                                     | 0.155213  | 5.99E-06 | 7.98E-06 |
| <i>Monoglobaceae</i>                        | 0.3748                                       | 0.4634                                       | 0.306137  | 2.55E-06 | 3.64E-06 |
| <i>UCG-010</i>                              | 0.183833                                     | 0.204567                                     | 0.154173  | 1.29E-06 | 2.3E-06  |
| <i>Succinivibrionaceae</i>                  | 0.03983                                      | 0.024667                                     | -0.691293 | 6.19E-06 | 7.98E-06 |
| <i>Planococcaceae</i>                       | 0.004056                                     | 0.257333                                     | 5.987437  | 3.47E-06 | 4.79E-06 |
| <i>Akkermansiaceae</i>                      | 0.09105                                      | 0.1165                                       | 0.355599  | 7.72E-08 | 3.09E-07 |
| <i>Marinifilaceae</i>                       | 0.125667                                     | 0.07115                                      | -0.820666 | 3.16E-07 | 7.9E-07  |

|                                   |         |          |           |          |          |
|-----------------------------------|---------|----------|-----------|----------|----------|
| <i>Anaerofustaceae</i>            | 0.04903 | 0.038633 | -0.343819 | 2.72E-05 | 3.02E-05 |
| <i>unclassified_c__Clostridia</i> | 0.1464  | 0.148467 | 0.020224  | 0.00207  | 0.00207  |

**Table S5. Gut microbiota and KEGG orthologues involved in LPS production**

| Family                              | KEGG strains regarding LPS biosynthesis                    | Correlation | P-value | Adj P-value | Significance |
|-------------------------------------|------------------------------------------------------------|-------------|---------|-------------|--------------|
| <i>Ruminococcaceae</i>              | Bacterial invasion of epithelial cells                     | 0.7812      | 0.0001  | 0.0005      | ***          |
| <i>Ruminococcaceae</i>              | Legionellosis                                              | 0.4550      | 0.0578  | 0.1386      |              |
| <i>Ruminococcaceae</i>              | Epithelial cell signaling in Helicobacter pylori infection | 0.2321      | 0.3541  | 0.6912      |              |
| <i>Ruminococcaceae</i>              | Salmonella infection                                       | 0.2922      | 0.2393  | 0.4102      |              |
| <i>Ruminococcaceae</i>              | Pertussis                                                  | 0.6236      | 0.0057  | 0.0091      | **           |
| <i>Ruminococcaceae</i>              | Vibrio cholerae infection                                  | 0.1813      | 0.4715  | 0.6708      |              |
| <i>Bacteroidaceae</i>               | Bacterial invasion of epithelial cells                     | -0.6212     | 0.0059  | 0.0071      | **           |
| <i>Bacteroidaceae</i>               | Legionellosis                                              | -0.2588     | 0.2998  | 0.4498      |              |
| <i>Bacteroidaceae</i>               | Epithelial cell signaling in Helicobacter pylori infection | -0.4810     | 0.0433  | 0.1299      | *            |
| <i>Bacteroidaceae</i>               | Salmonella infection                                       | -0.3650     | 0.1364  | 0.3274      |              |
| <i>Bacteroidaceae</i>               | Pertussis                                                  | -0.8782     | 0.0000  | 0.0000      | ***          |
| <i>Bacteroidaceae</i>               | Vibrio cholerae infection                                  | -0.5081     | 0.0313  | 0.0752      | *            |
| <i>Lachnospiraceae</i>              | Bacterial invasion of epithelial cells                     | -0.5630     | 0.0150  | 0.0163      | *            |
| <i>Lachnospiraceae</i>              | Legionellosis                                              | -0.1201     | 0.6349  | 0.7619      |              |
| <i>Lachnospiraceae</i>              | Epithelial cell signaling in Helicobacter pylori infection | 0.0865      | 0.7328  | 0.8564      |              |
| <i>Lachnospiraceae</i>              | Salmonella infection                                       | -0.2964     | 0.2324  | 0.4102      |              |
| <i>Lachnospiraceae</i>              | Pertussis                                                  | -0.2175     | 0.3859  | 0.3859      |              |
| <i>Lachnospiraceae</i>              | Vibrio cholerae infection                                  | -0.0442     | 0.8618  | 0.8618      |              |
| <i>norank_o__Clostridia_UCG-014</i> | Bacterial invasion of epithelial cells                     | 0.6676      | 0.0025  | 0.0037      | **           |
| <i>norank_o__Clostridia_UCG-014</i> | Legionellosis                                              | 0.4894      | 0.0393  | 0.1178      | *            |
| <i>norank_o__Clostridia_UCG-014</i> | Epithelial cell signaling in Helicobacter pylori infection | 0.7280      | 0.0006  | 0.0037      | ***          |
| <i>norank_o__Clostridia_UCG-014</i> | Salmonella infection                                       | 0.0239      | 0.9251  | 0.9251      |              |
| <i>norank_o__Clostridia_UCG-014</i> | Pertussis                                                  | 0.6260      | 0.0054  | 0.0091      | **           |
| <i>norank_o__Clostridia_UCG-014</i> | Vibrio cholerae infection                                  | 0.1205      | 0.6338  | 0.7481      |              |
| <i>Oscillospiraceae</i>             | Bacterial invasion of epithelial cells                     | -0.6302     | 0.0051  | 0.0067      | **           |
| <i>Oscillospiraceae</i>             | Legionellosis                                              | 0.0890      | 0.7253  | 0.7913      |              |
| <i>Oscillospiraceae</i>             | Epithelial cell signaling in Helicobacter pylori infection | 0.3306      | 0.1803  | 0.4327      |              |
| <i>Oscillospiraceae</i>             | Salmonella infection                                       | -0.8666     | 0.0000  | 0.0000      | ***          |
| <i>Oscillospiraceae</i>             | Pertussis                                                  | -0.8019     | 0.0001  | 0.0002      | ***          |
| <i>Oscillospiraceae</i>             | Vibrio cholerae infection                                  | -0.7021     | 0.0012  | 0.0046      | **           |
| <i>Rikenellaceae</i>                | Bacterial invasion of epithelial cells                     | -0.7054     | 0.0011  | 0.0023      | **           |



|                                            |                                                            |         |        |        |     |
|--------------------------------------------|------------------------------------------------------------|---------|--------|--------|-----|
| <i>Rikenellaceae</i>                       | Legionellosis                                              | -0.2827 | 0.2556 | 0.4382 |     |
| <i>Rikenellaceae</i>                       | Epithelial cell signaling in Helicobacter pylori infection | -0.2038 | 0.4173 | 0.6912 |     |
| <i>Rikenellaceae</i>                       | Salmonella infection                                       | -0.5458 | 0.0191 | 0.0573 | *   |
| <i>Rikenellaceae</i>                       | Pertussis                                                  | -0.8866 | 0.0000 | 0.0000 | *** |
| <i>Rikenellaceae</i>                       | Vibrio cholerae infection                                  | -0.5117 | 0.0299 | 0.0752 | *   |
| <i>norank_o_RF39</i>                       | Bacterial invasion of epithelial cells                     | 0.5459  | 0.0191 | 0.0191 | *   |
| <i>norank_o_RF39</i>                       | Legionellosis                                              | 0.3057  | 0.2173 | 0.4347 |     |
| <i>norank_o_RF39</i>                       | Epithelial cell signaling in Helicobacter pylori infection | 0.7277  | 0.0006 | 0.0037 | *** |
| <i>norank_o_RF39</i>                       | Salmonella infection                                       | 0.0469  | 0.8534 | 0.9251 |     |
| <i>norank_o_RF39</i>                       | Pertussis                                                  | 0.6198  | 0.0061 | 0.0091 | **  |
| <i>norank_o_RF39</i>                       | Vibrio cholerae infection                                  | 0.2324  | 0.3533 | 0.6057 |     |
| <i>Prevotellaceae</i>                      | Bacterial invasion of epithelial cells                     | 0.8187  | 0.0000 | 0.0004 | *** |
| <i>Prevotellaceae</i>                      | Legionellosis                                              | 0.6896  | 0.0015 | 0.0062 | **  |
| <i>Prevotellaceae</i>                      | Epithelial cell signaling in Helicobacter pylori infection | 0.0488  | 0.8474 | 0.8564 |     |
| <i>Prevotellaceae</i>                      | Salmonella infection                                       | 0.2666  | 0.2849 | 0.4274 |     |
| <i>Prevotellaceae</i>                      | Pertussis                                                  | 0.3968  | 0.1030 | 0.1236 |     |
| <i>Prevotellaceae</i>                      | Vibrio cholerae infection                                  | -0.1688 | 0.5031 | 0.6708 |     |
| <i>Eubacterium_coprostanoligenes_group</i> | Bacterial invasion of epithelial cells                     | 0.7803  | 0.0001 | 0.0005 | *** |
| <i>Eubacterium_coprostanoligenes_group</i> | Legionellosis                                              | -0.0268 | 0.9160 | 0.9160 |     |
| <i>Eubacterium_coprostanoligenes_group</i> | Epithelial cell signaling in Helicobacter pylori infection | 0.0459  | 0.8564 | 0.8564 |     |
| <i>Eubacterium_coprostanoligenes_group</i> | Salmonella infection                                       | 0.7393  | 0.0005 | 0.0018 | *** |
| <i>Eubacterium_coprostanoligenes_group</i> | Pertussis                                                  | 0.9282  | 0.0000 | 0.0000 | *** |
| <i>Eubacterium_coprostanoligenes_group</i> | Vibrio cholerae infection                                  | 0.7297  | 0.0006 | 0.0045 | *** |
| <i>Erysipelatoclostridiaceae</i>           | Bacterial invasion of epithelial cells                     | 0.6954  | 0.0014 | 0.0023 | **  |
| <i>Erysipelatoclostridiaceae</i>           | Legionellosis                                              | 0.8117  | 0.0000 | 0.0005 | *** |
| <i>Erysipelatoclostridiaceae</i>           | Epithelial cell signaling in Helicobacter pylori infection | 0.5156  | 0.0285 | 0.1141 | *   |
| <i>Erysipelatoclostridiaceae</i>           | Salmonella infection                                       | 0.0375  | 0.8826 | 0.9251 |     |
| <i>Erysipelatoclostridiaceae</i>           | Pertussis                                                  | 0.5640  | 0.0148 | 0.0197 | *   |
| <i>Erysipelatoclostridiaceae</i>           | Vibrio cholerae infection                                  | -0.1025 | 0.6858 | 0.7481 |     |
| <i>Enterococcaceae</i>                     | Bacterial invasion of epithelial cells                     | 0.7481  | 0.0004 | 0.0011 | *** |
| <i>Enterococcaceae</i>                     | Legionellosis                                              | -0.1335 | 0.5976 | 0.7619 |     |
| <i>Enterococcaceae</i>                     | Epithelial cell signaling in Helicobacter pylori infection | -0.1629 | 0.5184 | 0.6912 |     |
| <i>Enterococcaceae</i>                     | Salmonella infection                                       | 0.8053  | 0.0001 | 0.0003 | *** |
| <i>Enterococcaceae</i>                     | Pertussis                                                  | 0.8240  | 0.0000 | 0.0001 | *** |
| <i>Enterococcaceae</i>                     | Vibrio cholerae infection                                  | 0.7205  | 0.0007 | 0.0045 | *** |
| <i>Eggerthellaceae</i>                     | Bacterial invasion of epithelial cells                     | -0.6965 | 0.0013 | 0.0023 | **  |
| <i>Eggerthellaceae</i>                     | Legionellosis                                              | -0.7564 | 0.0003 | 0.0017 | *** |

|                        |                                                            |         |        |        |  |
|------------------------|------------------------------------------------------------|---------|--------|--------|--|
| <i>Eggerthellaceae</i> | Epithelial cell signaling in Helicobacter pylori infection | -0.1672 | 0.5072 | 0.6912 |  |
| <i>Eggerthellaceae</i> | Salmonella infection                                       | -0.0952 | 0.7071 | 0.9251 |  |
| <i>Eggerthellaceae</i> | Pertussis                                                  | -0.2843 | 0.2528 | 0.2758 |  |
| <i>Eggerthellaceae</i> | Vibrio cholerae infection                                  | 0.3031  | 0.2215 | 0.4430 |  |

**Table S6. Effect of ryegrass on the relationship of gut microbiota at class level and SCFAs**

| <b>Class</b>               | <b>SCFAs</b>    | <b>Correlation</b> | <b>P-value</b> | <b>Adj P-value</b> | <b>Significance</b> |
|----------------------------|-----------------|--------------------|----------------|--------------------|---------------------|
| <i>Clostridia</i>          | Acetic acid     | -0.760860651       | 0.000245813    | 0.000807587        | ***                 |
| <i>Clostridia</i>          | Propionic acid  | -0.596365112       | 0.008993928    | 0.019588471        | **                  |
| <i>Clostridia</i>          | Butyric acid    | -0.275107922       | 0.269210243    | 0.423044667        |                     |
| <i>Clostridia</i>          | Isovaleric acid | -0.616862556       | 0.006393533    | 0.011721477        | **                  |
| <i>Clostridia</i>          | Valeric acid    | -0.743142063       | 0.000409572    | 0.001501762        | ***                 |
| <i>Bacteroidia</i>         | Acetic acid     | 0.747065026        | 0.000367085    | 0.000807587        | ***                 |
| <i>Bacteroidia</i>         | Propionic acid  | 0.585489825        | 0.010684621    | 0.019588471        | *                   |
| <i>Bacteroidia</i>         | Butyric acid    | 0.382701362        | 0.117006009    | 0.214511016        |                     |
| <i>Bacteroidia</i>         | Isovaleric acid | 0.660509643        | 0.002847679    | 0.006264895        | **                  |
| <i>Bacteroidia</i>         | Valeric acid    | 0.690451586        | 0.001514367    | 0.004164508        | **                  |
| <i>Bacilli</i>             | Acetic acid     | -0.059546753       | 0.81443691     | 0.81443691         |                     |
| <i>Bacilli</i>             | Propionic acid  | -0.042888517       | 0.865816902    | 0.865816902        |                     |
| <i>Bacilli</i>             | Butyric acid    | -0.137166979       | 0.587303383    | 0.646033722        |                     |
| <i>Bacilli</i>             | Isovaleric acid | -0.225329295       | 0.368652895    | 0.368652895        |                     |
| <i>Bacilli</i>             | Valeric acid    | -0.027773637       | 0.91288959     | 0.91288959         |                     |
| <i>Coriobacteriia</i>      | Acetic acid     | -0.750289603       | 0.000334995    | 0.000807587        | ***                 |
| <i>Coriobacteriia</i>      | Propionic acid  | -0.615231128       | 0.006575051    | 0.018081389        | **                  |
| <i>Coriobacteriia</i>      | Butyric acid    | -0.535070837       | 0.022130606    | 0.060859168        | *                   |
| <i>Coriobacteriia</i>      | Isovaleric acid | -0.804710516       | 5.65E-05       | 0.000621147        | ***                 |
| <i>Coriobacteriia</i>      | Valeric acid    | -0.547085879       | 0.018787949    | 0.034444574        | *                   |
| <i>Actinobacteria</i>      | Acetic acid     | 0.282118009        | 0.256699181    | 0.352961374        |                     |
| <i>Actinobacteria</i>      | Propionic acid  | 0.205654663        | 0.412965663    | 0.567827787        |                     |
| <i>Actinobacteria</i>      | Butyric acid    | 0.105539165        | 0.676834527    | 0.676834527        |                     |
| <i>Actinobacteria</i>      | Isovaleric acid | 0.675201286        | 0.002107151    | 0.005794665        | **                  |
| <i>Actinobacteria</i>      | Valeric acid    | 0.141273895        | 0.5760514      | 0.704062822        |                     |
| <i>Vampirivibrionia</i>    | Acetic acid     | 0.858516074        | 5.13E-06       | 2.82E-05           | ***                 |
| <i>Vampirivibrionia</i>    | Propionic acid  | 0.752317227        | 0.000316052    | 0.001738285        | ***                 |
| <i>Vampirivibrionia</i>    | Butyric acid    | 0.39450113         | 0.105217636    | 0.214511016        |                     |
| <i>Vampirivibrionia</i>    | Isovaleric acid | 0.775033003        | 0.000158301    | 0.000870656        | ***                 |
| <i>Vampirivibrionia</i>    | Valeric acid    | 0.848006077        | 8.79E-06       | 4.83E-05           | ***                 |
| <i>Gammaproteobacteria</i> | Acetic acid     | -0.584250244       | 0.010892466    | 0.017116733        | *                   |
| <i>Gammaproteobacteria</i> | Propionic acid  | -0.495291065       | 0.036618501    | 0.057543358        | *                   |
| <i>Gammaproteobacteria</i> | Butyric acid    | -0.649178796       | 0.003554555    | 0.01955005         | **                  |

|                            |                 |              |             |             |     |
|----------------------------|-----------------|--------------|-------------|-------------|-----|
| <i>Gammaproteobacteria</i> | Isovaleric acid | -0.38964613  | 0.109960148 | 0.134395736 |     |
| <i>Gammaproteobacteria</i> | Valeric acid    | -0.367365434 | 0.133685619 | 0.210077401 |     |
| <i>Desulfovibrionia</i>    | Acetic acid     | -0.204855733 | 0.414822928 | 0.507005801 |     |
| <i>Desulfovibrionia</i>    | Propionic acid  | -0.178886422 | 0.477564086 | 0.583689439 |     |
| <i>Desulfovibrionia</i>    | Butyric acid    | 0.218446909  | 0.383839731 | 0.469137449 |     |
| <i>Desulfovibrionia</i>    | Isovaleric acid | -0.463484786 | 0.052716169 | 0.082839694 |     |
| <i>Desulfovibrionia</i>    | Valeric acid    | -0.262926382 | 0.291832761 | 0.401270046 |     |
| <i>Verrucomicrobiae</i>    | Acetic acid     | -0.674859318 | 0.002122366 | 0.003891004 | **  |
| <i>Verrucomicrobiae</i>    | Propionic acid  | -0.625309366 | 0.005517479 | 0.018081389 | **  |
| <i>Verrucomicrobiae</i>    | Butyric acid    | -0.56139749  | 0.015340034 | 0.05624679  | *   |
| <i>Verrucomicrobiae</i>    | Isovaleric acid | -0.442374823 | 0.066021251 | 0.09077922  |     |
| <i>Verrucomicrobiae</i>    | Valeric acid    | -0.675302275 | 0.002102675 | 0.004625885 | **  |
| <i>Alphaproteobacteria</i> | Acetic acid     | 0.895861132  | 0           | 5.49E-06    | *** |
| <i>Alphaproteobacteria</i> | Propionic acid  | 0.866090727  | 3.39E-06    | 3.73E-05    | *** |
| <i>Alphaproteobacteria</i> | Butyric acid    | 0.661119518  | 0.002813183 | 0.01955005  | **  |
| <i>Alphaproteobacteria</i> | Isovaleric acid | 0.743842552  | 0.000401696 | 0.001472886 | *** |
| <i>Alphaproteobacteria</i> | Valeric acid    | 0.888353753  | 8.51E-07    | 9.36E-06    | *** |
| <i>Negativicutes</i>       | Acetic acid     | 0.177021289  | 0.482242506 | 0.530466756 |     |
| <i>Negativicutes</i>       | Propionic acid  | 0.05958413   | 0.814322352 | 0.865816902 |     |
| <i>Negativicutes</i>       | Butyric acid    | 0.245332174  | 0.326475723 | 0.448904119 |     |
| <i>Negativicutes</i>       | Isovaleric acid | 0.298804715  | 0.228408411 | 0.251249252 |     |
| <i>Negativicutes</i>       | Valeric acid    | -0.058013169 | 0.81914022  | 0.901054242 |     |

**Table S7. Effect of ryegrass on the relationship of gut microbiota at a family level and SCFAs**

| Family                 | SCFAs           | Correlation | P-value   | Adj P-value | Significance |
|------------------------|-----------------|-------------|-----------|-------------|--------------|
| <i>Ruminococcaceae</i> | Acetic acid     | -0.5828454  | 0.0111319 | 0.0190833   | *            |
| <i>Ruminococcaceae</i> | Propionic acid  | -0.4575359  | 0.0562406 | 0.0749875   |              |
| <i>Ruminococcaceae</i> | Butyric acid    | -0.2415943  | 0.3341332 | 0.445511    |              |
| <i>Ruminococcaceae</i> | Isovaleric acid | -0.2423201  | 0.3326381 | 0.4989571   |              |
| <i>Ruminococcaceae</i> | Valeric acid    | -0.5956671  | 0.0090955 | 0.0155923   | **           |
| <i>Bacteroidaceae</i>  | Acetic acid     | 0.91292962  | 1.26E-07  | 1.51E-06    | ***          |
| <i>Bacteroidaceae</i>  | Propionic acid  | 0.92041418  | 6.29E-08  | 7.55E-07    | ***          |
| <i>Bacteroidaceae</i>  | Butyric acid    | 0.79392723  | 8.37E-05  | 0.0003418   | ***          |
| <i>Bacteroidaceae</i>  | Isovaleric acid | 0.76442845  | 0.0002207 | 0.0013239   | ***          |
| <i>Bacteroidaceae</i>  | Valeric acid    | 0.86549546  | 3.50E-06  | 4.20E-05    | ***          |
| <i>Lachnospiraceae</i> | Acetic acid     | 0.12276315  | 0.6274701 | 0.6845128   |              |
| <i>Lachnospiraceae</i> | Propionic acid  | 0.06583131  | 0.7952275 | 0.7952275   |              |
| <i>Lachnospiraceae</i> | Butyric acid    | 0.05964273  | 0.8141428 | 0.8141428   |              |
| <i>Lachnospiraceae</i> | Isovaleric acid | -0.0583754  | 0.8180288 | 0.8180288   |              |
| <i>Lachnospiraceae</i> | Valeric acid    | 0.0345728   | 0.8916715 | 0.8916715   |              |

|                                            |                 |            |           |           |     |
|--------------------------------------------|-----------------|------------|-----------|-----------|-----|
| <i>norank_o__Clostridia_UCG-014</i>        | Acetic acid     | -0.8330951 | 1.77E-05  | 7.07E-05  | *** |
| <i>norank_o__Clostridia_UCG-014</i>        | Propionic acid  | -0.7583392 | 0.000265  | 0.0007274 | *** |
| <i>norank_o__Clostridia_UCG-014</i>        | Butyric acid    | -0.4358307 | 0.0706124 | 0.1210499 |     |
| <i>norank_o__Clostridia_UCG-014</i>        | Isovaleric acid | -0.7341886 | 0.0005222 | 0.0020889 | *** |
| <i>norank_o__Clostridia_UCG-014</i>        | Valeric acid    | -0.8034709 | 5.92E-05  | 0.0003549 | *** |
| <i>Oscillospiraceae</i>                    | Acetic acid     | 0.43131856 | 0.0739127 | 0.0985503 |     |
| <i>Oscillospiraceae</i>                    | Propionic acid  | 0.53125422 | 0.0232846 | 0.0349269 | *   |
| <i>Oscillospiraceae</i>                    | Butyric acid    | 0.7933386  | 8.55E-05  | 0.0003418 | *** |
| <i>Oscillospiraceae</i>                    | Isovaleric acid | 0.13405773 | 0.5958825 | 0.6500536 |     |
| <i>Oscillospiraceae</i>                    | Valeric acid    | 0.33763408 | 0.1706049 | 0.2274731 |     |
| <i>Rikenellaceae</i>                       | Acetic acid     | 0.72096771 | 0.0007352 | 0.0017645 | *** |
| <i>Rikenellaceae</i>                       | Propionic acid  | 0.80096213 | 6.49E-05  | 0.0002597 | *** |
| <i>Rikenellaceae</i>                       | Butyric acid    | 0.81743235 | 3.44E-05  | 0.0003418 | *** |
| <i>Rikenellaceae</i>                       | Isovaleric acid | 0.47868561 | 0.0444666 | 0.1067198 | *   |
| <i>Rikenellaceae</i>                       | Valeric acid    | 0.69710176 | 0.0013032 | 0.0039097 | **  |
| <i>norank_o__RF39</i>                      | Acetic acid     | -0.8660976 | 3.39E-06  | 2.03E-05  | *** |
| <i>norank_o__RF39</i>                      | Propionic acid  | -0.8011408 | 6.45E-05  | 0.0002597 | *** |
| <i>norank_o__RF39</i>                      | Butyric acid    | -0.5274954 | 0.0244666 | 0.0489331 | *   |
| <i>norank_o__RF39</i>                      | Isovaleric acid | -0.8504904 | 7.77E-06  | 9.32E-05  | *** |
| <i>norank_o__RF39</i>                      | Valeric acid    | -0.7900829 | 9.58E-05  | 0.0003831 | *** |
| <i>Prevotellaceae</i>                      | Acetic acid     | -0.1293386 | 0.6090011 | 0.6845128 |     |
| <i>Prevotellaceae</i>                      | Propionic acid  | -0.2398059 | 0.3378335 | 0.4054002 |     |
| <i>Prevotellaceae</i>                      | Butyric acid    | -0.2229378 | 0.3738913 | 0.4486696 |     |
| <i>Prevotellaceae</i>                      | Isovaleric acid | 0.17956409 | 0.4758698 | 0.6344931 |     |
| <i>Prevotellaceae</i>                      | Valeric acid    | -0.2038791 | 0.4170993 | 0.5005192 |     |
| <i>Eubacterium_coprostanoligenes_group</i> | Acetic acid     | -0.7999961 | 6.73E-05  | 0.0002018 | *** |
| <i>Eubacterium_coprostanoligenes_group</i> | Propionic acid  | -0.7537672 | 0.0003031 | 0.0007274 | *** |
| <i>Eubacterium_coprostanoligenes_group</i> | Butyric acid    | -0.7827986 | 0.0001227 | 0.0003682 | *** |
| <i>Eubacterium_coprostanoligenes_group</i> | Isovaleric acid | -0.5255044 | 0.0251114 | 0.0753341 | *   |
| <i>Eubacterium_coprostanoligenes_group</i> | Valeric acid    | -0.6525184 | 0.0033327 | 0.0079986 | **  |
| <i>Erysipelatoclostridiaceae</i>           | Acetic acid     | -0.5100922 | 0.0305622 | 0.0458432 | *   |
| <i>Erysipelatoclostridiaceae</i>           | Propionic acid  | -0.598447  | 0.0086963 | 0.0173926 | **  |
| <i>Erysipelatoclostridiaceae</i>           | Butyric acid    | -0.3963547 | 0.1034463 | 0.1551694 |     |
| <i>Erysipelatoclostridiaceae</i>           | Isovaleric acid | -0.2963813 | 0.2323871 | 0.3983778 |     |
| <i>Erysipelatoclostridiaceae</i>           | Valeric acid    | -0.6332507 | 0.0047854 | 0.0095707 | **  |
| <i>Enterococcaceae</i>                     | Acetic acid     | -0.6304261 | 0.0050361 | 0.0100722 | **  |
| <i>Enterococcaceae</i>                     | Propionic acid  | -0.5686779 | 0.0137901 | 0.0236402 | *   |
| <i>Enterococcaceae</i>                     | Butyric acid    | -0.6642466 | 0.0026417 | 0.00634   | **  |
| <i>Enterococcaceae</i>                     | Isovaleric acid | -0.3278104 | 0.1841826 | 0.3683652 |     |
| <i>Enterococcaceae</i>                     | Valeric acid    | -0.4672694 | 0.0505622 | 0.0758434 |     |
| <i>Eggerthellaceae</i>                     | Acetic acid     | 0.07446043 | 0.7690354 | 0.7690354 |     |
| <i>Eggerthellaceae</i>                     | Propionic acid  | 0.21938272 | 0.3817547 | 0.4164597 |     |

|                        |                 |            |           |           |  |
|------------------------|-----------------|------------|-----------|-----------|--|
| <i>Eggerthellaceae</i> | Butyric acid    | 0.17075289 | 0.498129  | 0.5434135 |  |
| <i>Eggerthellaceae</i> | Isovaleric acid | -0.1544552 | 0.5405751 | 0.6486901 |  |
| <i>Eggerthellaceae</i> | Valeric acid    | 0.17964852 | 0.4756589 | 0.5189007 |  |

**Table S8: Effect of ryegrass on the relationship of gut microbiota and host markers**

| Family                                     | Host markers | Correlation  | P-value  |
|--------------------------------------------|--------------|--------------|----------|
| <i>Ruminococcaceae</i>                     | NLRP3        | 0.822088731  | 2.84E-05 |
| <i>norank_o_Clostridia_UCG-014</i>         | T-AOC        | -0.87738917  | 1.74E-06 |
| <i>norank_o_Clostridia_UCG-014</i>         | CAT          | -0.816130055 | 3.62E-05 |
| <i>Oscillospiraceae</i>                    | IgM          | 0.921699728  | 5.55E-08 |
| <i>Oscillospiraceae</i>                    | IgD          | 0.828379199  | 2.18E-05 |
| <i>Oscillospiraceae</i>                    | MDA          | -0.824228115 | 2.60E-05 |
| <i>Oscillospiraceae</i>                    | NFE2L2       | 0.93727161   | 9.89E-09 |
| <i>Oscillospiraceae</i>                    | B220         | 0.855771889  | 5.93E-06 |
| <i>Oscillospiraceae</i>                    | CD8          | 0.933653344  | 1.53E-08 |
| <i>Oscillospiraceae</i>                    | CD3          | 0.964208136  | 1.21E-10 |
| <i>Rikenellaceae</i>                       | GSR          | 0.828623167  | 2.15E-05 |
| <i>Rikenellaceae</i>                       | NFE2L2       | 0.865444978  | 3.51E-06 |
| <i>Rikenellaceae</i>                       | CD3          | 0.879847477  | 1.49E-06 |
| <i>norank_o_RF39</i>                       | T-AOC        | -0.822880024 | 2.75E-05 |
| <i>norank_o_RF39</i>                       | HDAC         | 0.800443762  | 6.62E-05 |
| <i>Prevotellaceae</i>                      | IgG          | -0.897932876 | 4.28E-07 |
| <i>Prevotellaceae</i>                      | GSH-Px       | -0.87194576  | 2.41E-06 |
| <i>Prevotellaceae</i>                      | IgA          | -0.807517949 | 5.08E-05 |
| <i>Prevotellaceae</i>                      | T-SOD        | -0.953818377 | 9.00E-10 |
| <i>Prevotellaceae</i>                      | ROS          | 0.953977261  | 8.76E-10 |
| <i>Prevotellaceae</i>                      | AA           | -0.810389247 | 4.55E-05 |
| <i>Prevotellaceae</i>                      | PA           | -0.907072702 | 2.08E-07 |
| <i>Prevotellaceae</i>                      | BA           | -0.866175564 | 3.37E-06 |
| <i>Prevotellaceae</i>                      | Nrf2         | -0.926249343 | 3.49E-08 |
| <i>Prevotellaceae</i>                      | HO-1         | -0.944498827 | 3.80E-09 |
| <i>Prevotellaceae</i>                      | CD19         | -0.833654984 | 1.72E-05 |
| <i>Prevotellaceae</i>                      | IL-10        | -0.91581898  | 9.71E-08 |
| <i>Prevotellaceae</i>                      | AMPK         | -0.832031217 | 1.85E-05 |
| <i>Prevotellaceae</i>                      | IL-4         | -0.900934841 | 3.40E-07 |
| <i>Prevotellaceae</i>                      | TGF-B        | 0.876003461  | 1.89E-06 |
| <i>Prevotellaceae</i>                      | Inos         | 0.858188024  | 5.22E-06 |
| <i>Eubacterium_coprostanoligenes_group</i> | IgM          | -0.840840735 | 1.24E-05 |
| <i>Eubacterium_coprostanoligenes_group</i> | GSR          | -0.810477604 | 4.53E-05 |
| <i>Eubacterium_coprostanoligenes_group</i> | MDA          | 0.813679292  | 4.00E-05 |
| <i>Eubacterium_coprostanoligenes_group</i> | Keap1        | 0.974434551  | 8.47E-12 |
| <i>Erysipelatoclostridiaceae</i>           | Nrf2         | -0.819918375 | 3.11E-05 |
| <i>Erysipelatoclostridiaceae</i>           | TGF-B        | 0.856131446  | 5.82E-06 |
| <i>Erysipelatoclostridiaceae</i>           | iNOS         | 0.889662623  | 7.77E-07 |
| <i>Enterococcaceae</i>                     | IgM          | -0.844572326 | 1.04E-05 |
| <i>Enterococcaceae</i>                     | Keap1        | 0.987353424  | 3.16E-14 |
| <i>Eggerthellaceae</i>                     | GSH-Px       | 0.891038582  | 7.06E-07 |
| <i>Eggerthellaceae</i>                     | T-SOD        | 0.851112813  | 7.53E-06 |
| <i>Eggerthellaceae</i>                     | ROS          | -0.94904994  | 1.95E-09 |
| <i>Eggerthellaceae</i>                     | PA           | 0.878140621  | 1.66E-06 |

|                        |       |              |          |
|------------------------|-------|--------------|----------|
| <i>Eggerthellaceae</i> | BA    | 0.816194259  | 3.61E-05 |
| <i>Eggerthellaceae</i> | Nrf2  | 0.923655303  | 4.56E-08 |
| <i>Eggerthellaceae</i> | HO-1  | 0.86318937   | 3.98E-06 |
| <i>Eggerthellaceae</i> | IL-10 | 0.85147303   | 7.39E-06 |
| <i>Eggerthellaceae</i> | IL-4  | 0.858606369  | 5.10E-06 |
| <i>Eggerthellaceae</i> | TGF-B | -0.821636212 | 2.89E-05 |
| <i>Eggerthellaceae</i> | iNOS  | -0.829187199 | 2.10E-05 |
