# Supplementary figures and images for: Supplementing Ryegrass Ameliorates Commercial Diet-Induced Gut Microbial Dysbiosis-Associated Spleen Dysfunctions by Gut–Microbiota–Spleen Axis
Source: MDPI journal article supplement (doi:10.3390/nu16050747), 2024-03-05

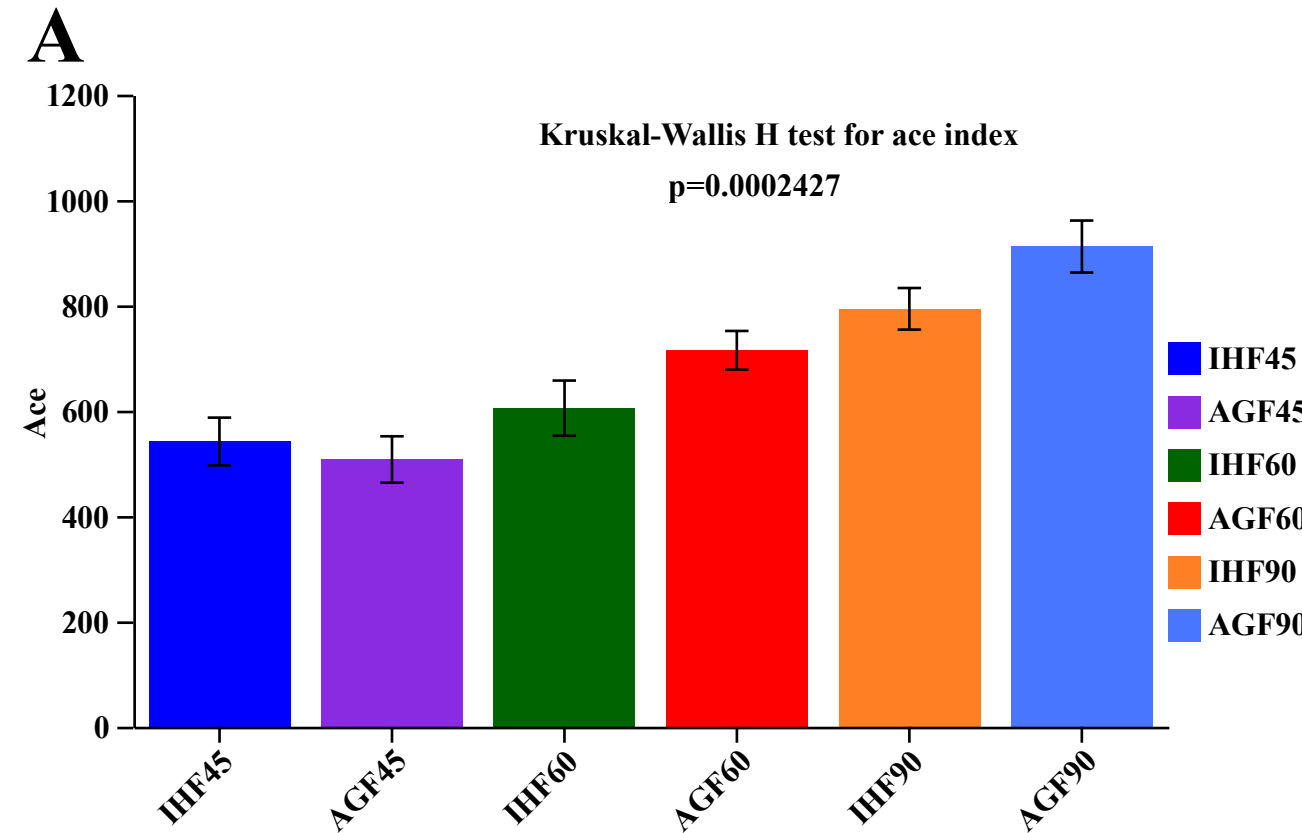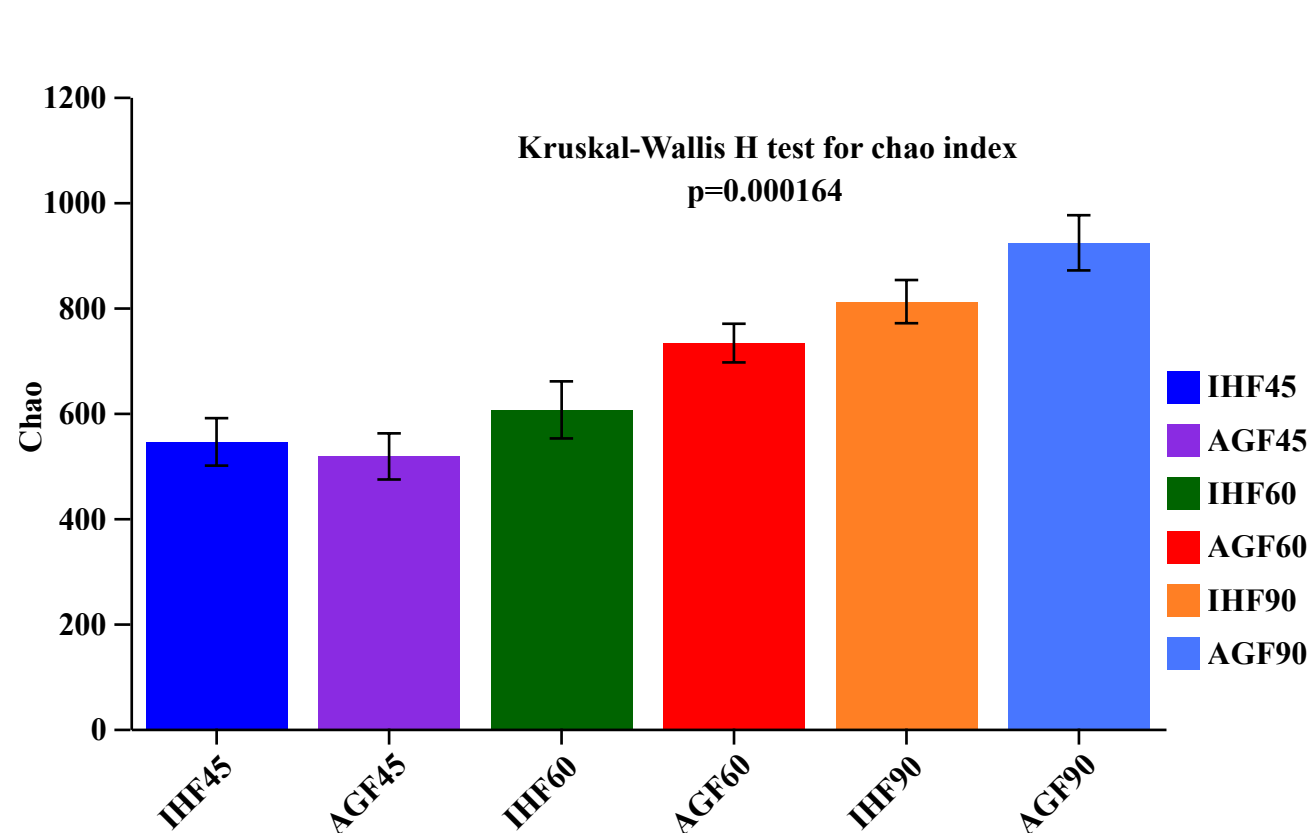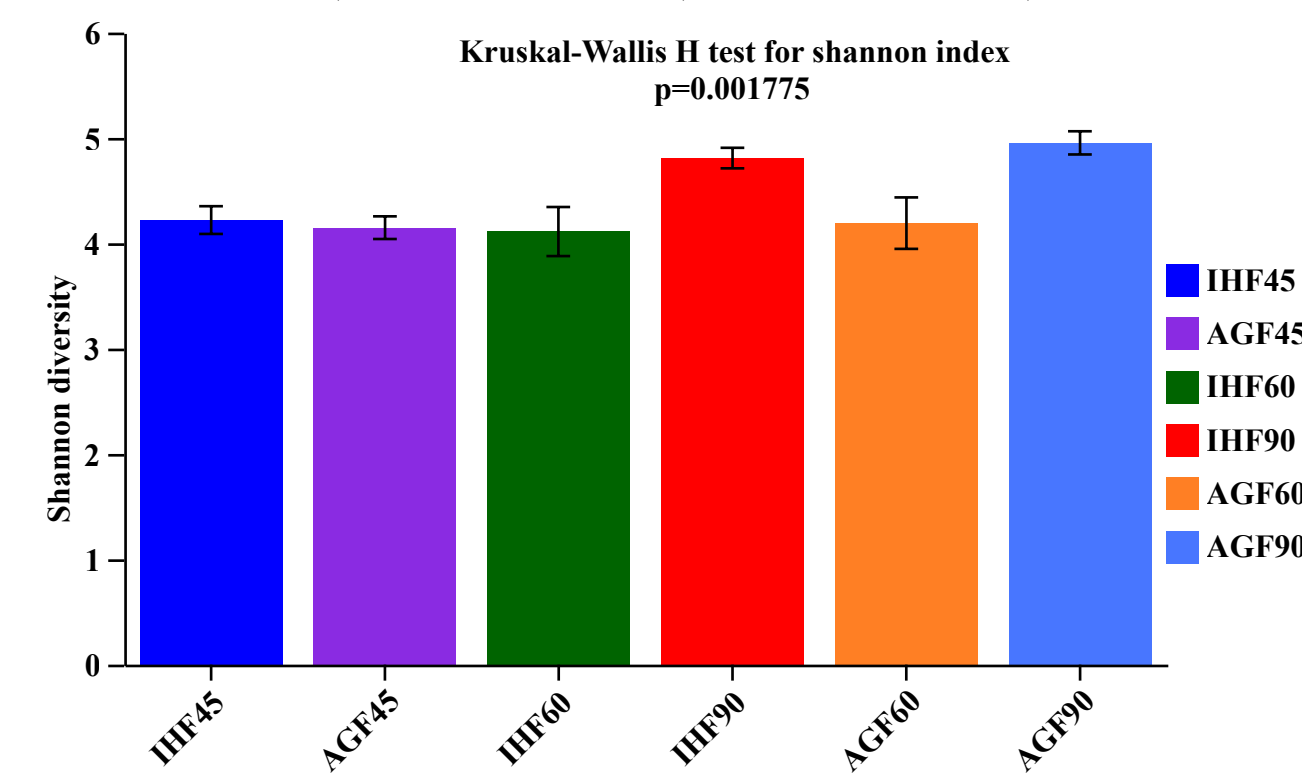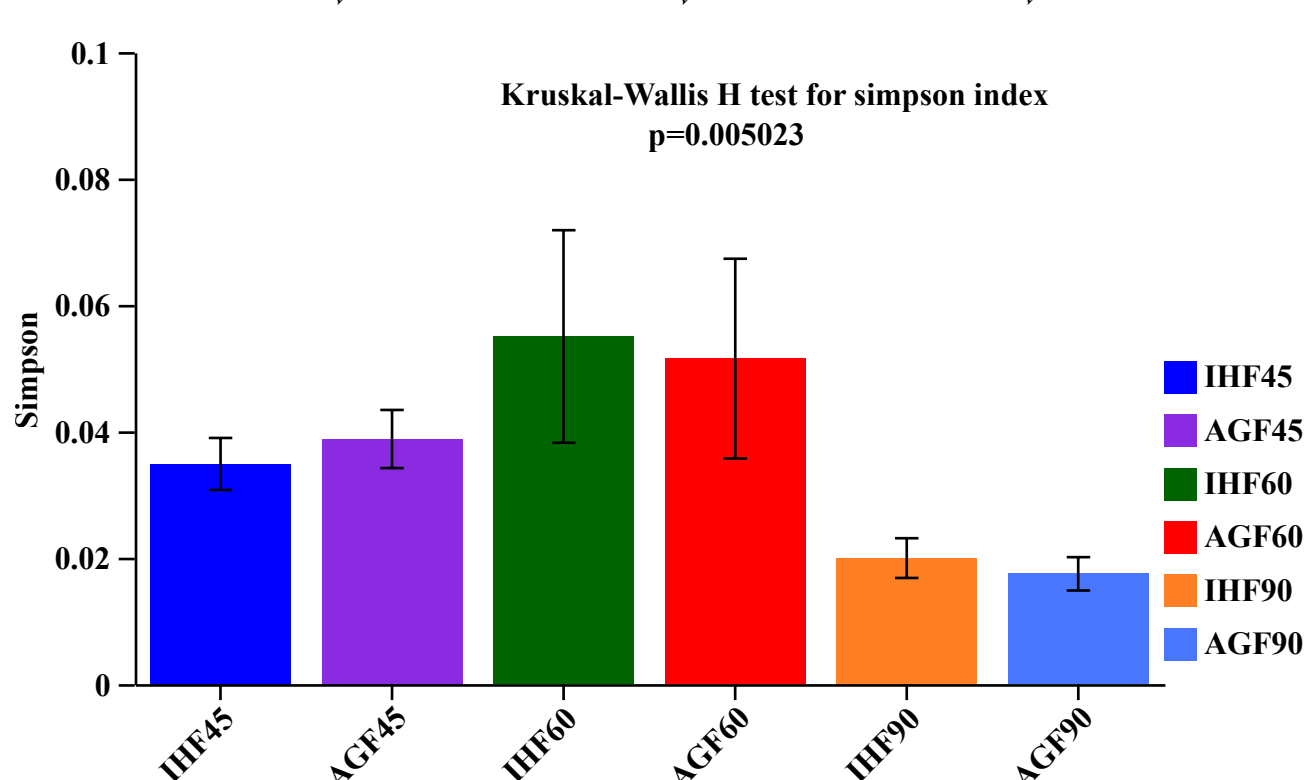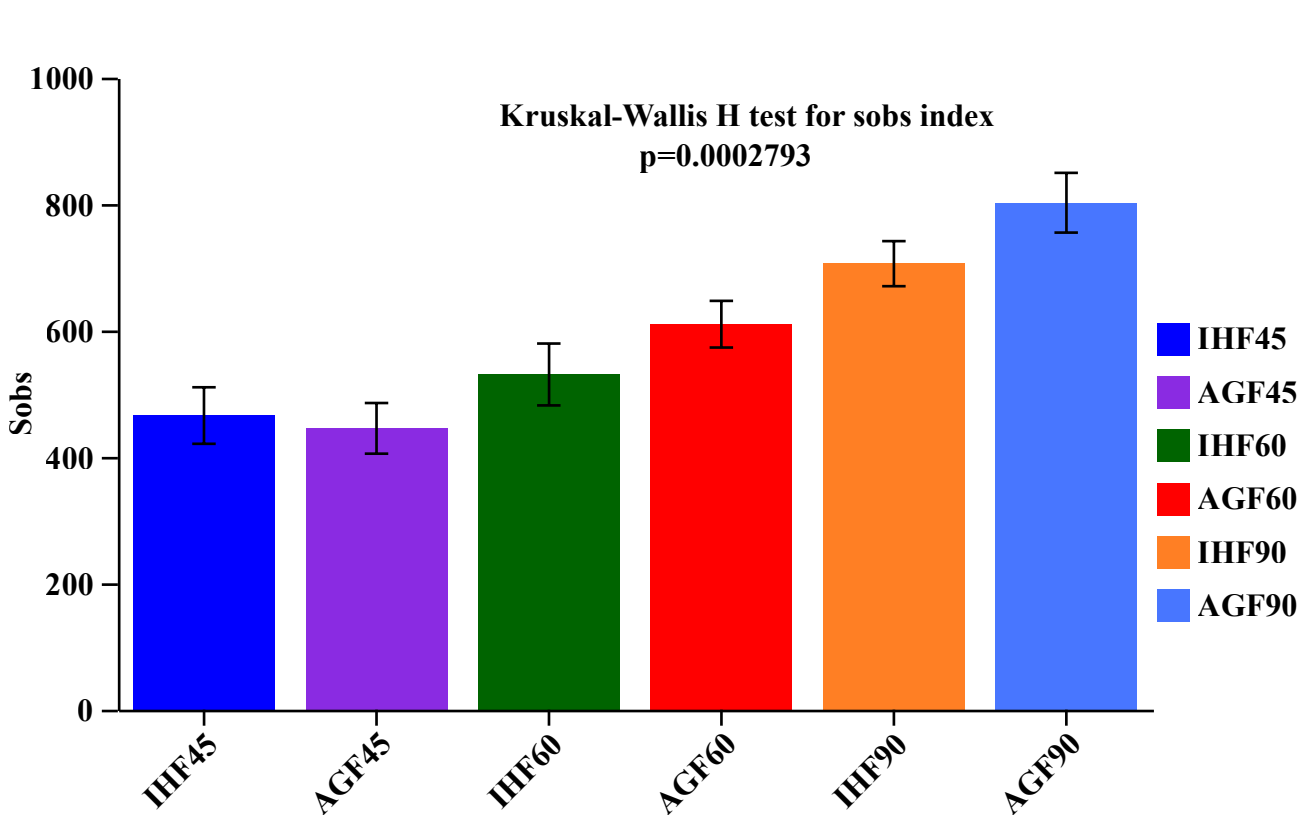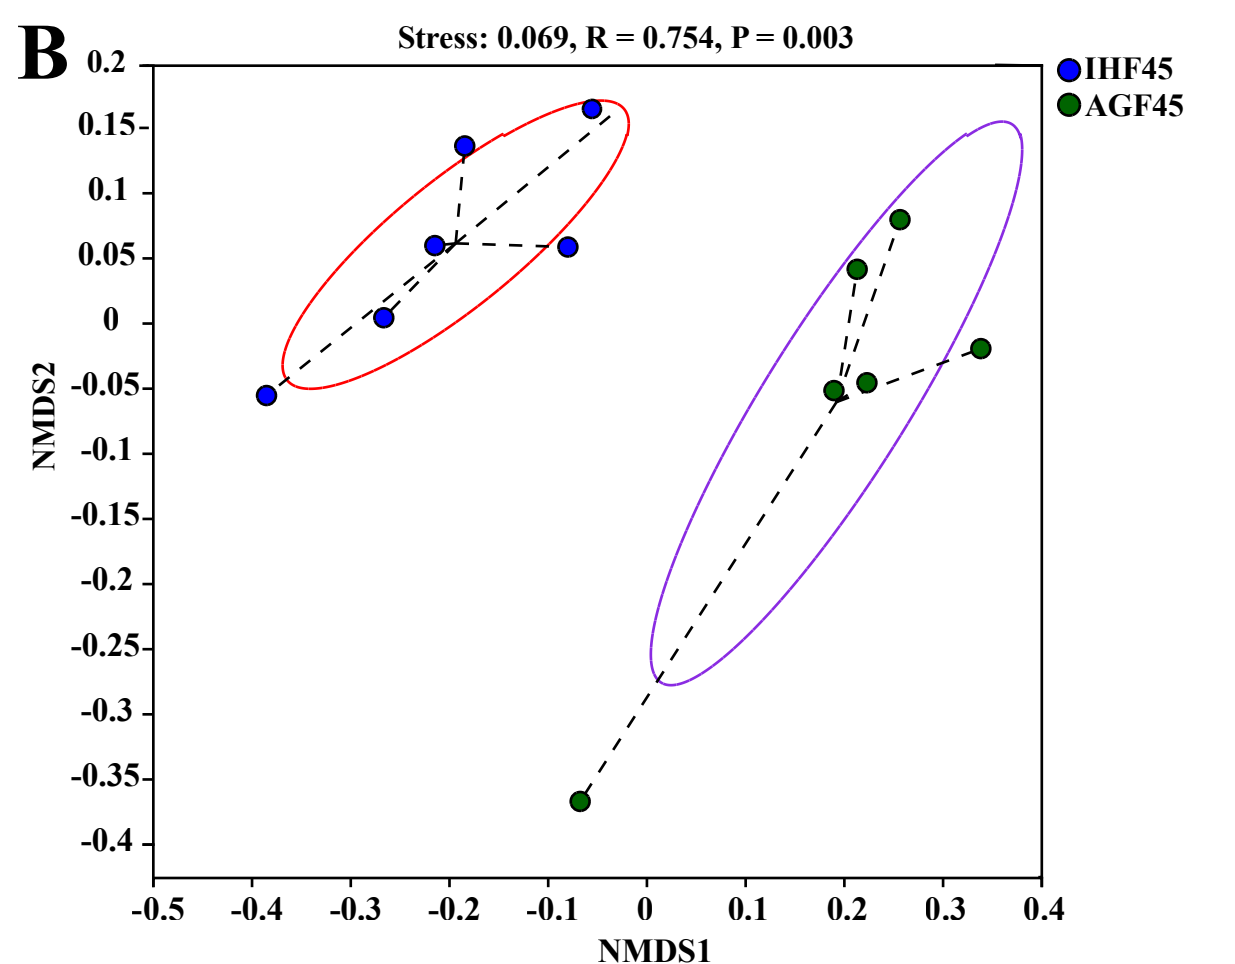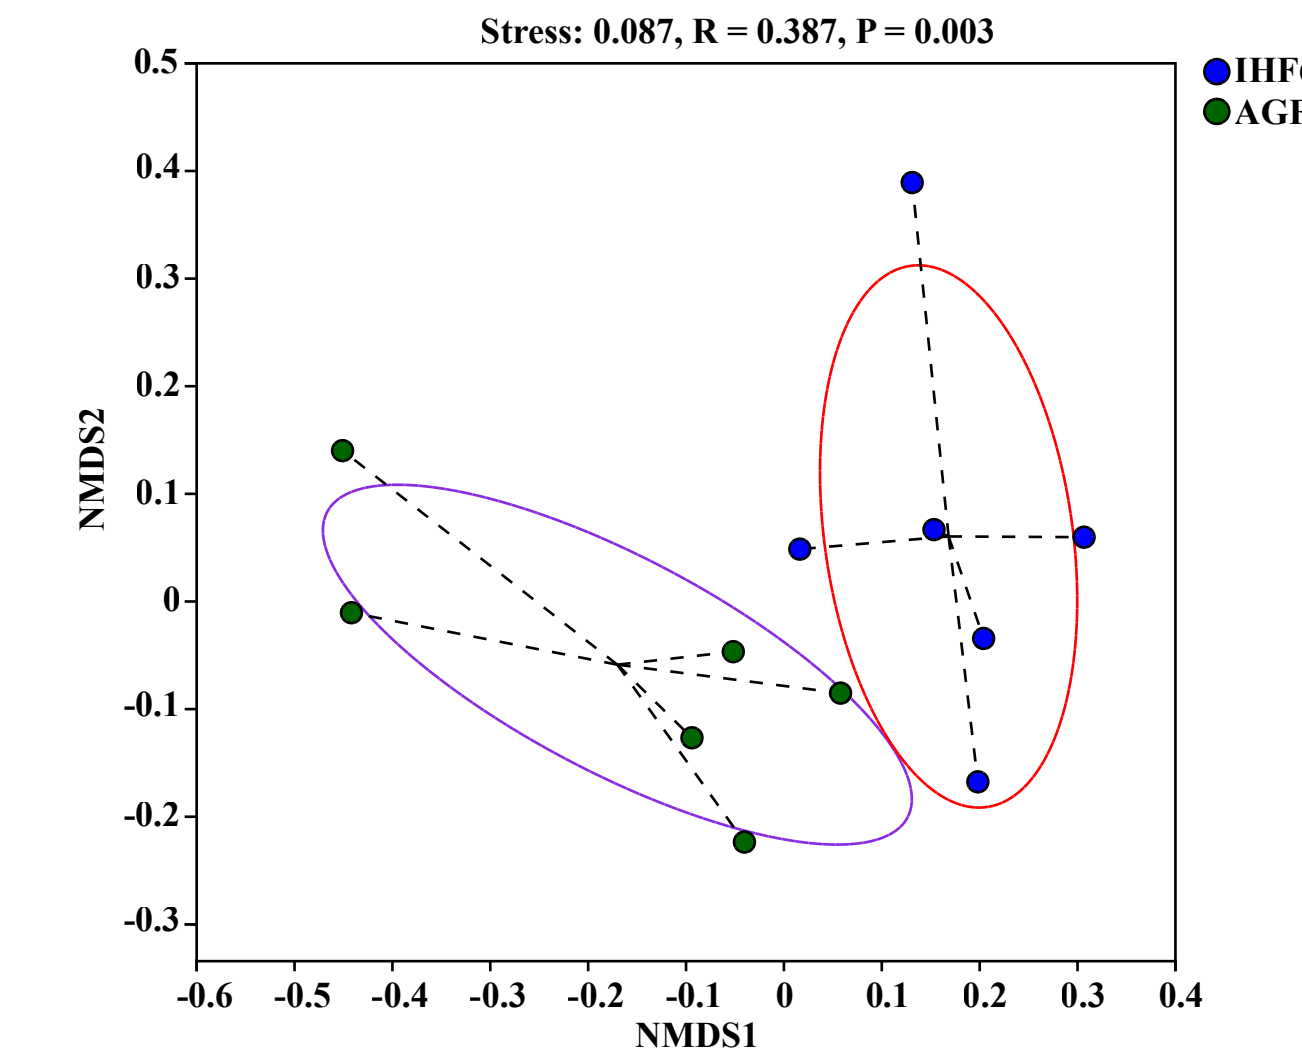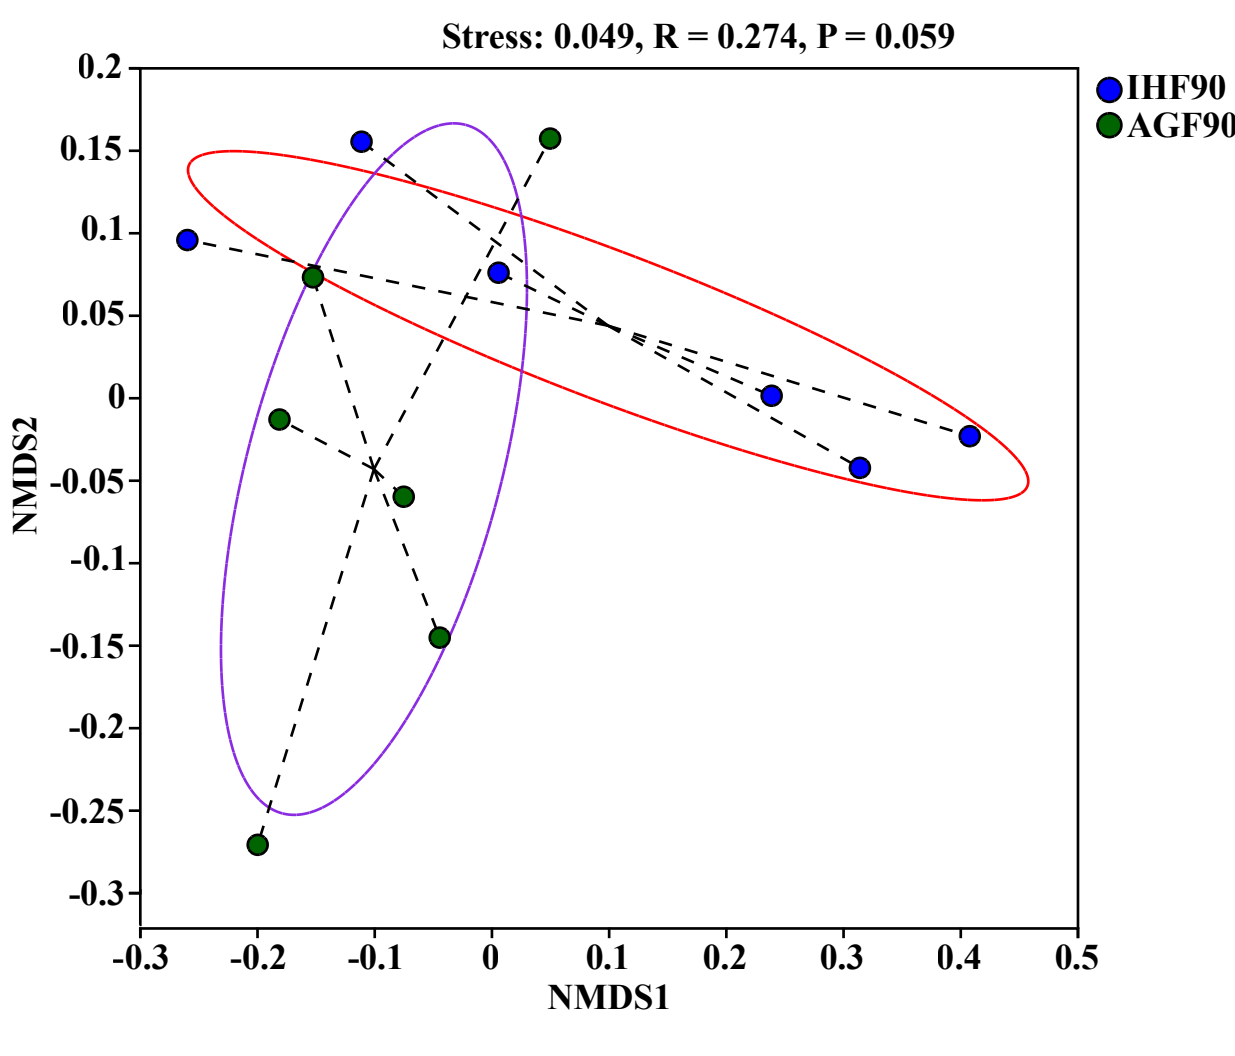

Supplement: s1 [file s1]

**A****Nrf2 regulated genes**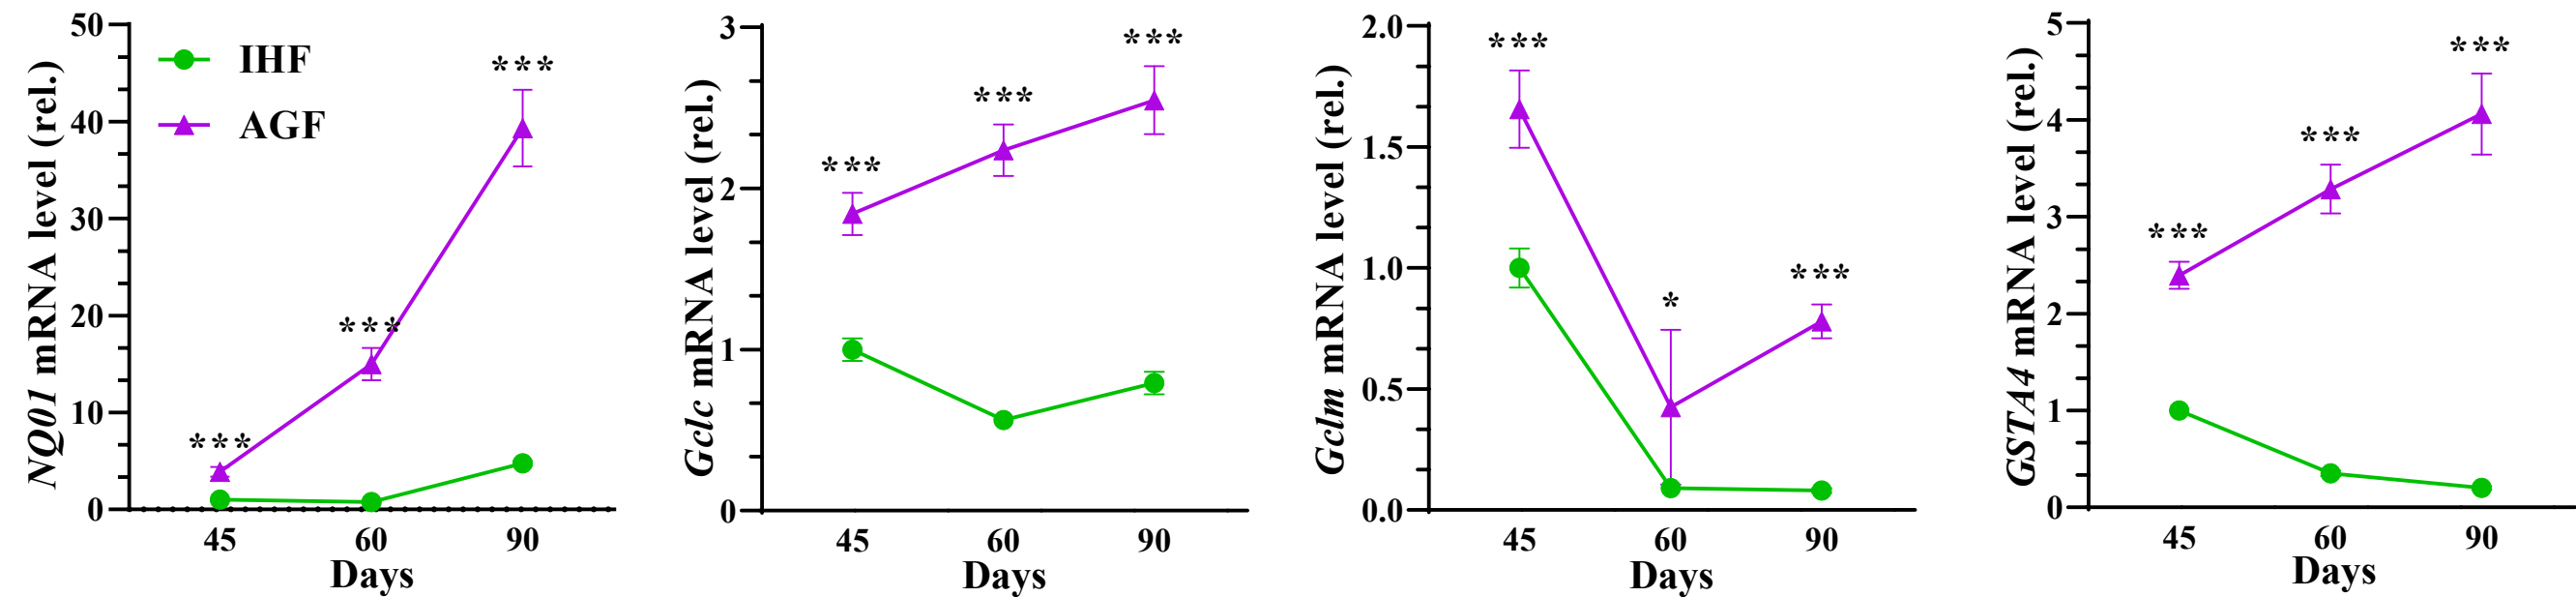**B**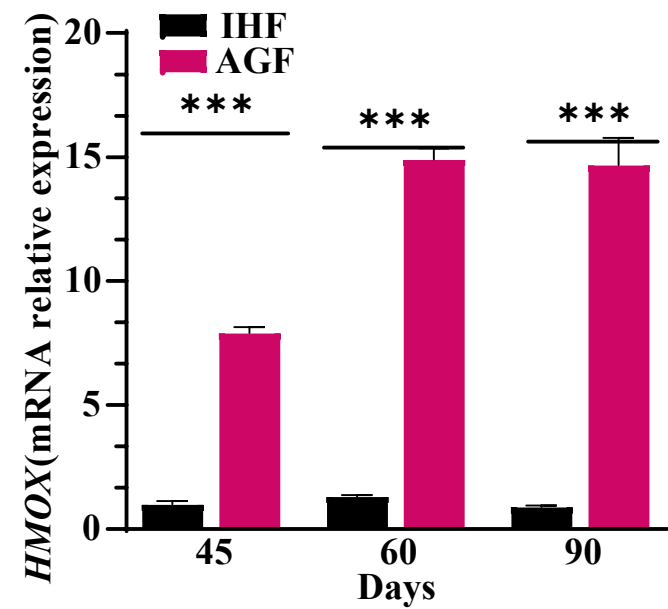**C**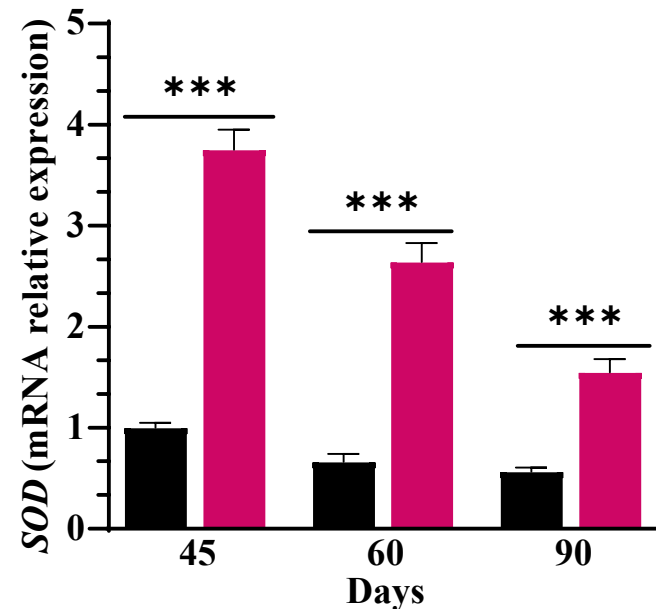**D**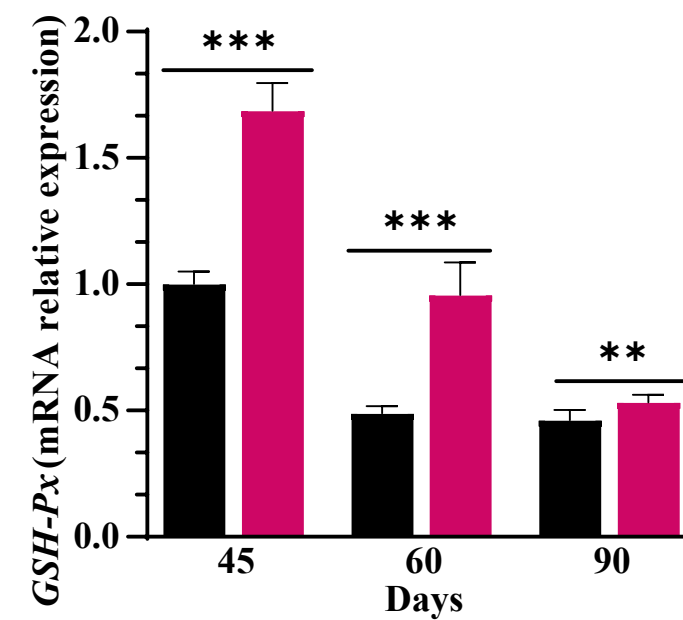**E**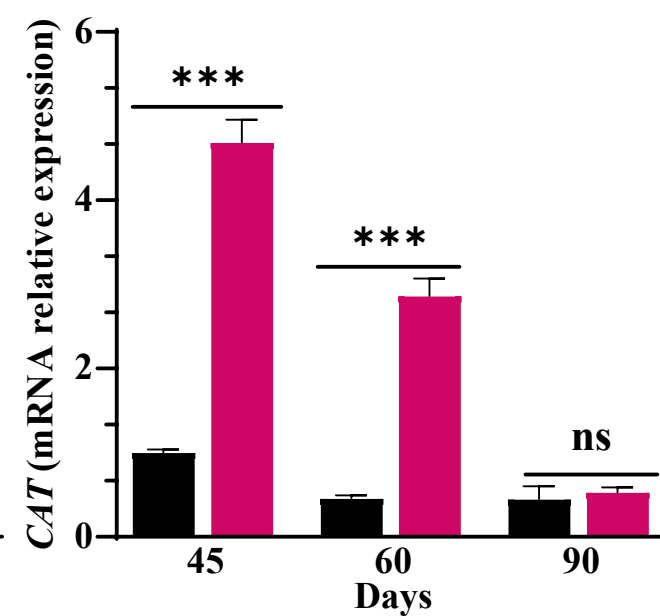

Supplement: s1 [file s1]

**A**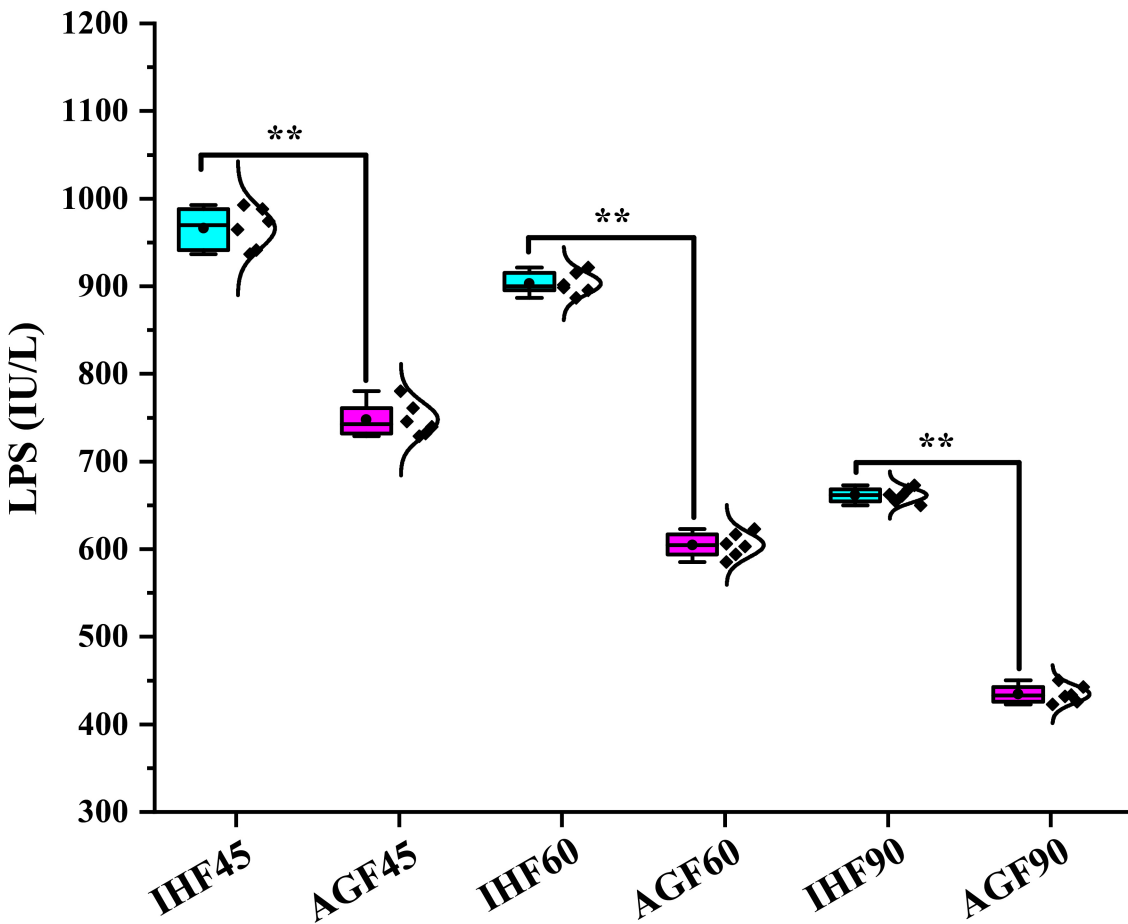**B**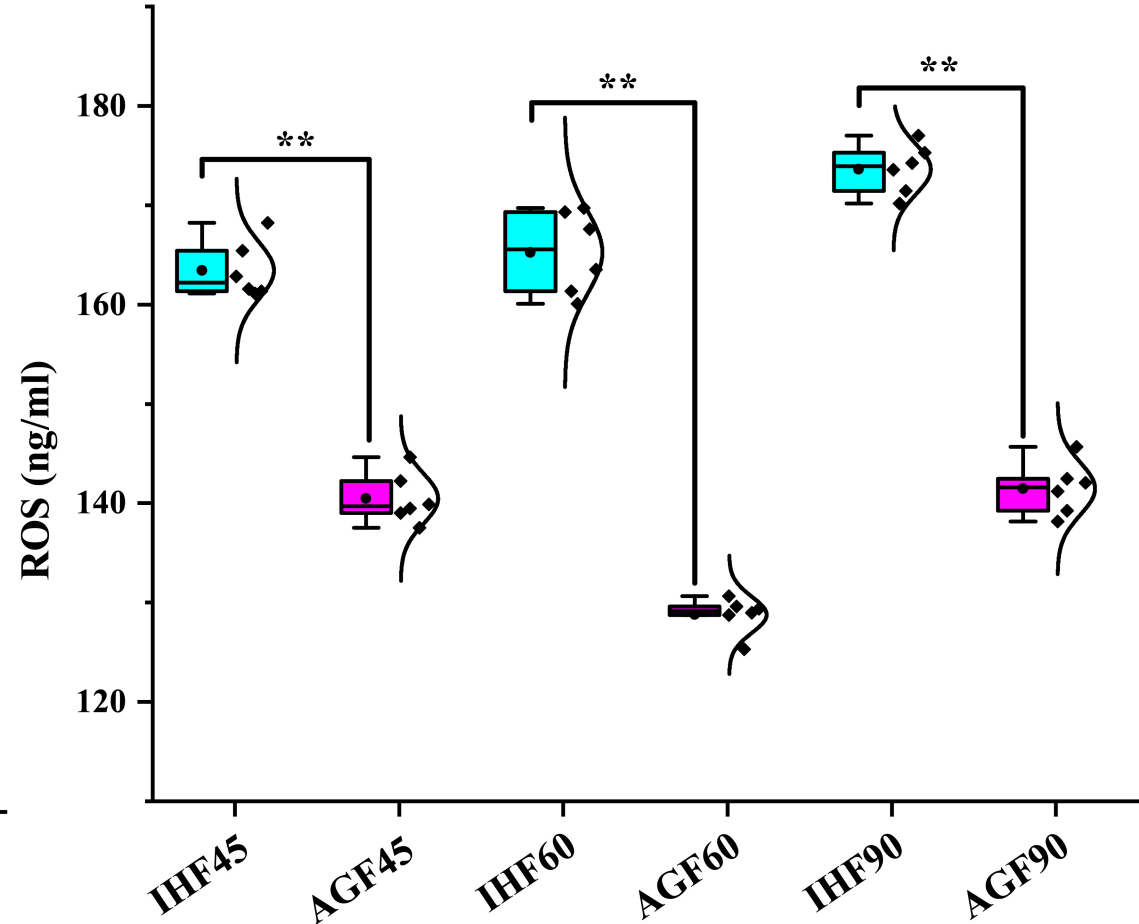

Supplement: s1 [file s1]

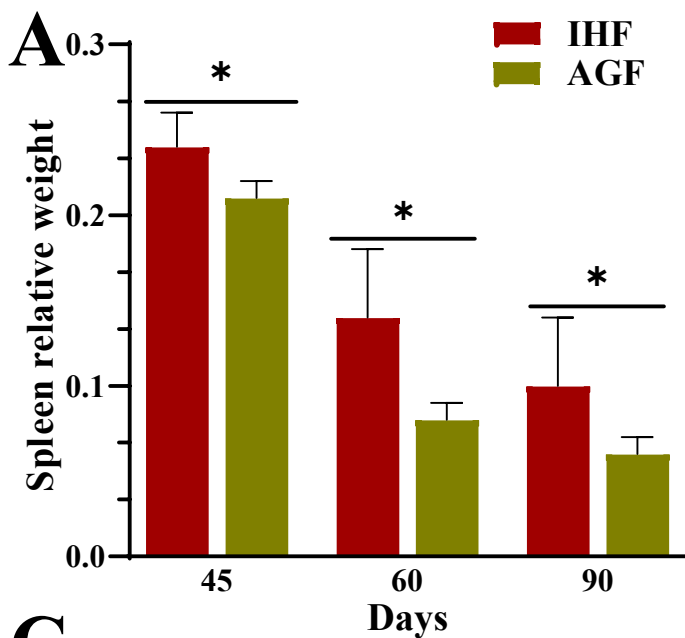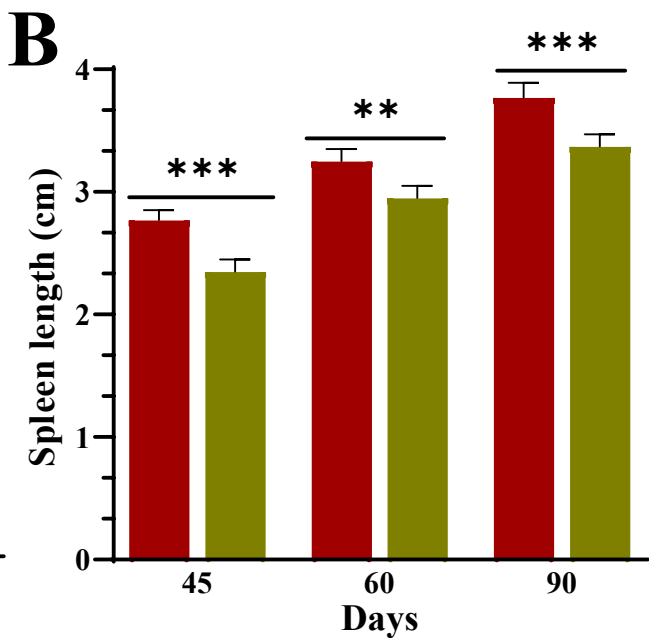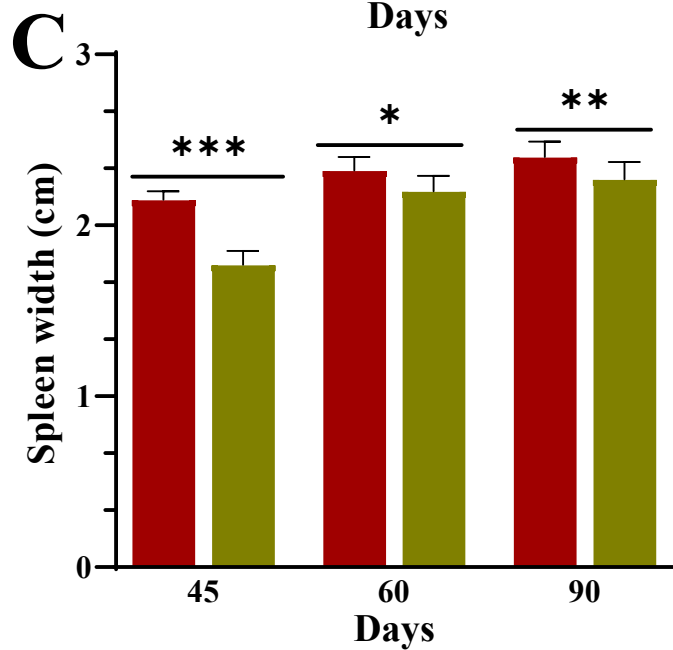

Supplement: s1 [file s1]

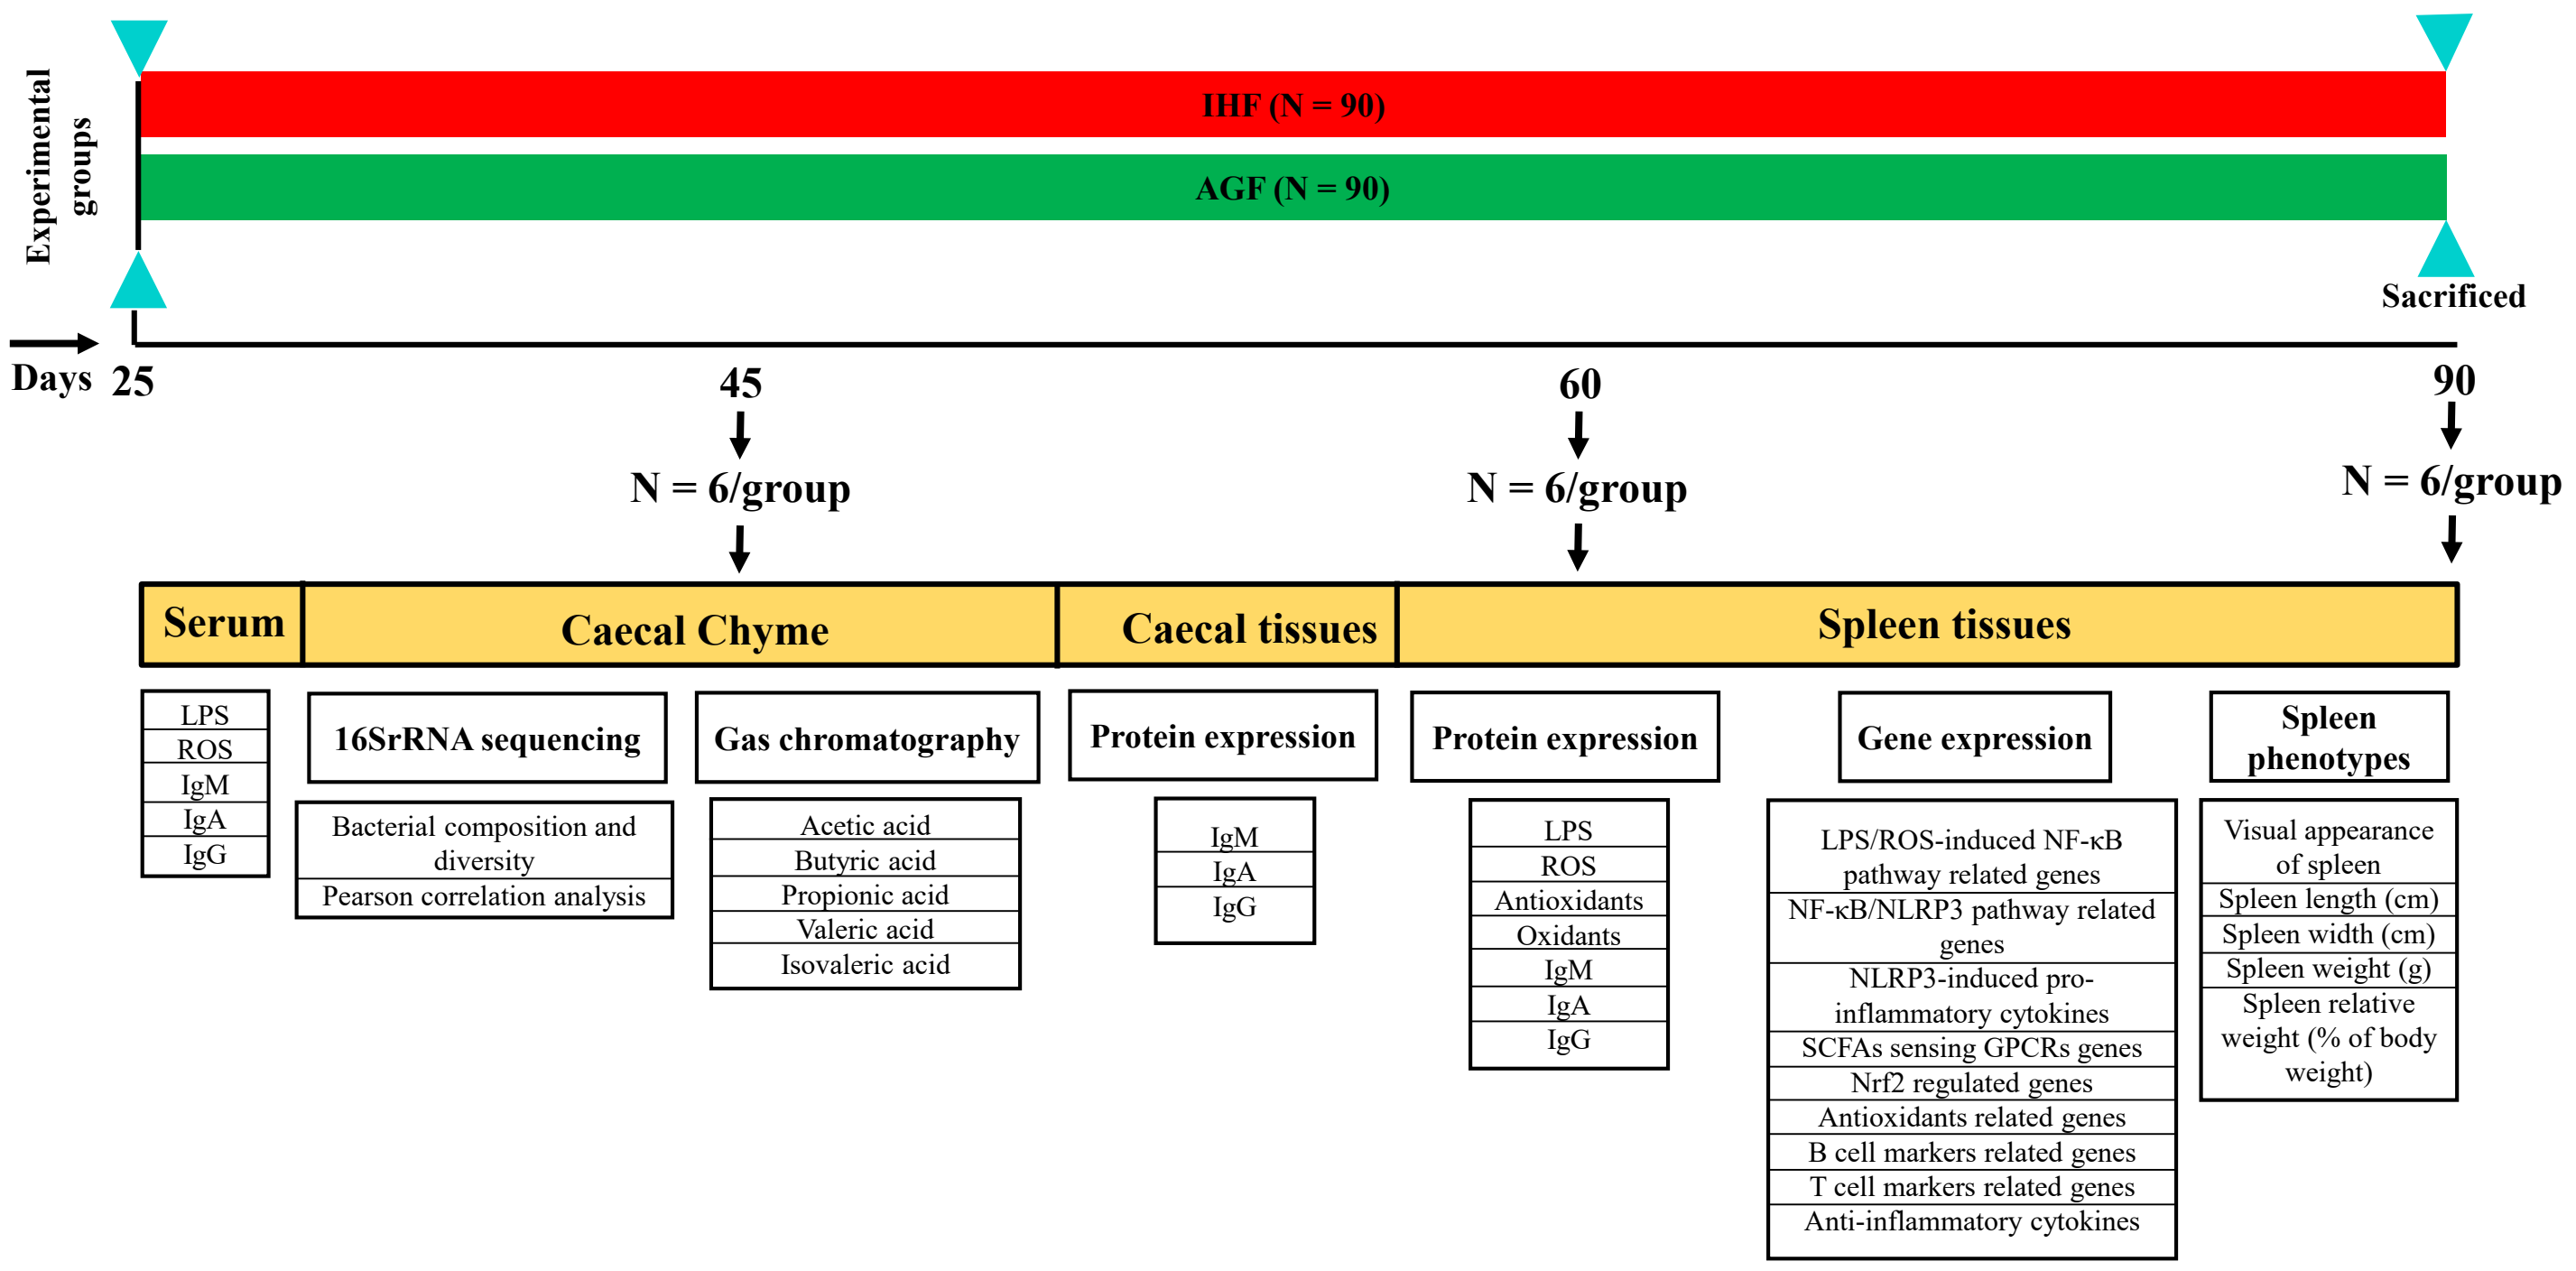

Supplement: s1 [file s1]

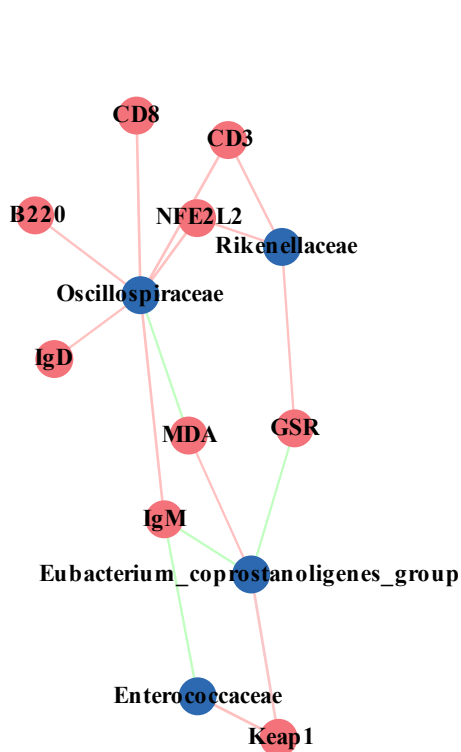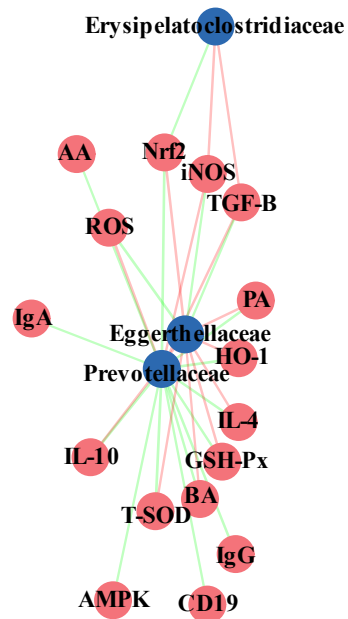

## Relation

— Positive

— Negative

## Spearman coefficient

— 0.70

— 0.99

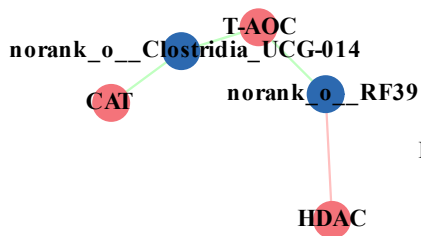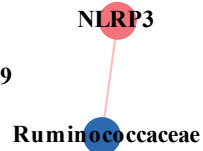

Supplement: s1 [file s1]
